1 Title

2 **Global transcriptome analysis reveals partial estrogen-like effects of karanjin in MCF-7**  
3 **breast cancer cells.**

4

5 Gaurav Bhatt, Akshita Gupta, Latha Rangan\*, Anil Mukund Limaye\*

6

7 Department of Biosciences and Bioengineering, Indian Institute of Technology Guwahati.

8 Guwahati 781039, Assam, India

9

10 **\*Corresponding authors**

11 Anil Mukund Limaye

12 Department of Biosciences and Bioengineering

13 Indian Institute of Technology Guwahati

14 Guwahati 781039

15 Assam, India

16 Email: [amul@iitg.ac.in](mailto:amul@iitg.ac.in)

17 Phone: 0361-258-2218

18 Fax: 0361-2582249

19

20 Latha Rangan

21 Department of Biosciences and Bioengineering

22 Indian Institute of Technology Guwahati

23 Guwahati 781039

24 Assam, India

25 Email: [lrangan@iitg.ac.in](mailto:lrangan@iitg.ac.in)

26 Phone: 0361-258-2201

27 Fax: 0361-2582201

28

## 29 **Abstract**

30 Karanjin, an abundantly occurring furanoflavonoid in edible and non-edible legumes, exerts  
31 diverse biological effects *in vivo*, and *in vitro*. Its potential as an anticancer agent is also  
32 gaining traction following recent demonstrations of its anti-proliferative, cell cycle inhibitory,  
33 and pro-apoptotic effects. However, the universality of its anticancer potential is yet to be  
34 scrutinized, particularly so because flavonoids can act as selective estrogen receptor  
35 modulators (SERMs). Even the genomic correlates of its biological activities are yet to be  
36 examined in hormone responsive cells. This paper presents the early and direct transcriptomic  
37 footprint of 10  $\mu$ M karanjin in MCF-7 breast cancer cells, using next generation sequencing  
38 technology (RNA-seq). We show that karanjin-modulated gene-expression repertoire is  
39 enriched in several hallmark gene sets, which include early estrogen-response, and G2/M  
40 checkpoint genes. Genes modulated by karanjin overlapped with those modulated by 1 nM  
41 17 $\beta$ -estradiol (E2), or 1  $\mu$ M tamoxifen. Karanjin altered the expression of selected estrogen-  
42 regulated genes in a cell-type, and concentration dependent manner. It downmodulated the  
43 expression of ER $\alpha$  protein in MCF-7 cells. Furthermore, ER $\alpha$  knockdown negatively  
44 impacted karanjin's ability to modulate the expression of selected E2 target genes. Our data  
45 suggest that karanjin exerts its effects on ER $\alpha$ -positive breast cancer cells, at least in part, via  
46 ER $\alpha$ . The apparent SERM-like effects of karanjin pose a caveat to the anticancer potential of  
47 karanjin. In-depth studies on cell-type and concentration-dependent effects of karanjin may  
48 bring out its true potential in endocrine therapies.

49

50 *Keywords:* Furanoflavonoid, karanjin, RNA-seq, gene expression, estrogenic activity,  
51 estrogen receptor, SERM

52

53

## 54 1. Introduction

55 Karanjin is a furanoflavonoid occurring widely in Leguminosae. It produces a myriad  
56 of biological effects *in vitro* or *in vivo*, such as anti-proliferative, glucose-uptake-promoting,  
57 anti-hyperglycemic, anti-inflammatory, and anti-ulcer (Singh et al., 2021). The cell-cycle  
58 inhibitory, and pro-apoptotic effects of karanjin *in vitro* have fuelled speculations about its  
59 anticancer properties (Guo et al., 2015; Roy et al., 2019). Recently, Roy and co-workers (Roy  
60 et al., 2019) reiterated karanjin-mediated G2/M arrest, and apoptosis in HeLa cells.  
61 Furthermore, they demonstrated karanjin induced DNA damage, and P53 expression,  
62 associated with lowered reactive oxygen species (ROS), and restricted nuclear translocation  
63 of NF- $\kappa$ B via cytoplasmic I- $\kappa$ B induction (Roy et al., 2019). The fact that karanjin exerts a  
64 much lower growth inhibitory effect on normal mouse embryonic fibroblasts (Roy et al.,  
65 2019) augurs well with its anticancer potential. All cancer cell lines tested so far are growth-  
66 inhibited by karanjin with varying IC<sub>50</sub> values.

67 Flavonoids can induce cell cycle arrest and apoptosis, thereby inhibiting proliferation  
68 of cells *in vitro* (Fotsis et al., 1997; Haddad et al., 2006; Memariani et al., 2021; Park et al.,  
69 2012; S. Singh et al., 2021; Xu et al., 2013; Zava and Duwe, 1997). Given the flavonoid  
70 structure of karanjin, its negative impact on cell proliferation is not surprising. However,  
71 flavonoids also bind ER $\alpha$  (Choi et al., 2008; Hong et al., 2015), modulate its transactivation  
72 function (Choi et al., 2008), and differentially effects cell proliferation and gene expression in  
73 a concentration and cell context dependent manner (Constantinou et al., 1998; Fioravanti et  
74 al., 1998; Hsu et al., 1999; Lavigne et al., 2008; Maggiolini et al., 2001; Yang et al., 2007).  
75 Thus, universality of the anti-tumor efficacy of karanjin cannot be concluded merely on the  
76 basis of its antiproliferative effects demonstrated in a few cell lines. The flavonoid structure  
77 of karanjin presents a caveat to its potential in anticancer therapy, lest it be counterproductive

78 in hormone dependent tumors. Arguably, the molecular phenotype of cells determines their  
79 response to karanjin in terms of alteration in growth, as well as global gene expression. The  
80 latter is crucial to the understanding of the biological effects of karanjin. However, the impact  
81 of karanjin on global gene expression, as yet, remains unaddressed.

82 In this study we used next generation sequencing technology to assess the  
83 transcriptomic response of MCF-7 breast cancer cells treated with 10  $\mu$ M karanjin for 24 h.  
84 Among the diverse repertoire of gene sets regulated by karanjin, we found G2/M-checkpoint,  
85 and estrogen-response-early genes. 10  $\mu$ M karanjin modulated G2/M checkpoint genes in a  
86 manner that is consistent with cell cycle progression, rather than cell cycle arrest. Modulation  
87 of estrogen-response-early genes, and few well-established estrogen-regulated genes in cell-  
88 type- and concentration-dependent manner, suggests partial estrogen-like effect of karanjin  
89 on gene expression in ER-positive breast cancer cells.

## 90 **2. Materials and Methods**

### 91 *2.1. Chemicals, reagents, and plasticware*

92 Karanjin was purchased from Yucca Enterprises (Batch No. Yucca/KG/2019/04/21,  
93 Mumbai, India). The purity and identity of the compound was independently verified by  
94 HPLC, HRMS, and NMR. The data matched with the previously isolated karanjin from  
95 *Pongamia pinnata* (L.) Pierre seeds as described earlier (Singh et al., 2016) (Supplementary  
96 data 1). 17 $\beta$ -estradiol (E2, Cat. No. E8875) was purchased from Sigma-Aldrich (MO, USA).  
97 Dulbecco's Modified Eagle Medium (DMEM) with (Cat. No. AT007) or without phenol red  
98 (Cat. No. AT187), Roswell Park Memorial Institute (RPMI)-1640 with (Cat. No. AT162) or  
99 without phenol red (Cat. No. AT171), Dulbecco's Phosphate Buffered Saline (DPBS, Cat. No.  
100 TS1006), trypsin-EDTA (Cat. No. TCL014), antibiotic solution (Cat. No. A001), fetal bovine  
101 serum (FBS, Cat. No. RM10432), and charcoal-stripped FBS (cs-FBS, Cat. No. RM10416),

102 were purchased from HiMedia (Mumbai, India). PowerUp SYBR Green PCR Master Mix  
103 (Cat. No. A25743), High-Capacity cDNA Reverse Transcription Kit (Cat. No. 4368814), ER $\alpha$   
104 siRNA (Cat No.4392420), scrambled siRNA (Cat. No. AM4611), and Lipofectamine  
105 RNAiMAX (Cat. No. 13778-075) were from Invitrogen (CA, USA). ER $\alpha$  antibody (Cat. No.  
106 8644S),  $\beta$ -actin (Cat. No. 4970T) and anti-rabbit immunoglobulin G (Cat. No. 7074S) were  
107 from Cell Signalling Technology (Massachusetts, USA). Polyclonal histone H3 antibody (Cat.  
108 No. BB-AB0055) was purchased from BioBharati LifeScience Pvt. Ltd. (Kolkata, India). All  
109 other chemicals and buffers were purchased from Merck (Mumbai, India), Sigma (St Louis,  
110 MO, USA), or SRL (Mumbai, India). All cell culture plasticware was purchased from  
111 Eppendorf (Hamburg, Germany).

## 112 2.2. *Cell culture*

113 MCF-7 and T47D cells were obtained from National Centre for Cell Science (NCCS)  
114 (Pune, India). MCF-7 or T47D cells were routinely cultured and maintained under standard  
115 conditions of 37°C and 5% CO<sub>2</sub> in phenol red-containing DMEM or RPMI-1640,  
116 respectively, which were supplemented with 10% heat-inactivated FBS, 100 units/mL  
117 penicillin, and 100  $\mu$ g/mL streptomycin (M1 medium).

## 118 2.3. *Treatment*

119 Cells were seeded in M1 medium. When 60% confluent, the cells were shifted to  
120 phenol red-free DMEM or RPMI-1640, supplemented with 10% heat-inactivated cs-FBS, 100  
121 units/mL penicillin, and 100  $\mu$ g/mL streptomycin (M2 medium) for 24 h. Thereafter, the cells  
122 were treated with vehicle (0.1% DMSO), 10 nM E2, or indicated concentrations of karanjin  
123 in M2 medium for indicated periods of time.

124 2.4. *Cell viability*

125 40,000 MCF-7 cells were seeded in 35 mm dishes with M1 medium. After 36 h, cells  
126 were washed twice with DPBS and incubated in M2 medium for 3 h. The cells were treated  
127 with vehicle (DMSO), 10 nM E2, or the indicated concentrations of karanjin in M2 medium  
128 for 0, 24, or 120 h. Thereafter, the cells were washed with DPBS, trypsinised, and viable cells  
129 were counted on the basis of trypan blue dye exclusion (Strober, 2001). 10 nM E2 treatment  
130 was used as a standard reference. The 0 h treatment group provided the starting viable counts.  
131 In case of longer (120 h) treatment durations, the treatment medium was replenished every 48  
132 h.

133 2.5. *Transcriptome profiling*

134 Total RNA quality was assessed using Bioanalyzer 2100 (Agilent Technologies, CA,  
135 US). RNA samples which were used for library preparation using TruSeq RNA Kit (Illumina,  
136 USA) had a concentration of 1 µg/ml and RIN value above 9.5. cDNAs reverse transcribed  
137 from mRNA were amplified, and purified using AMPureXP beads (Beckman Coulter, USA).  
138 The double-stranded cDNAs were end-repaired, polyadenylated, and ligated with adapter  
139 sequences followed by size selection for approximately 250-450 bp using AMPure XP beads.  
140 Uracil-containing strands were degraded by treatment with USER Enzyme (New England  
141 Biolabs, USA). Sequencing was performed using Illumina Novaseq 6000 Platform in paired-  
142 end format with the Phred score of 64. Approximately 40 million reads per sample were  
143 sequenced. The FASTQ files obtained after sequencing were subjected to QC using the  
144 FASTQC tool (Andrews et al., 2015). Trimming to remove the adapter sequences and short  
145 reads was performed using Trimmomatic (Bolger et al., 2014). The trimmed reads files were  
146 aligned using STAR aligner (Dobin et al., 2013). BAM files generated were used to obtain  
147 the read counts using the featureCounts tool (Liao et al., 2014). The read count files were

148 merged and processed further using the DESeq2 package in R (Love et al., 2014). The  
149 merged read counts file was subjected to count normalization to obtain the normalized counts.  
150 Quality control (QC) was performed on the normalized counts using unsupervised clustering  
151 analysis, and data visualization in the form of principal component analysis (PCA) plots and  
152 correlation heatmaps. Following QC, the normalized counts were fitted on the negative  
153 binomial model. After estimation of dispersion values, the normalized counts were subjected  
154 to statistical analyses to obtain differentially expressed genes. The differentially modulated  
155 genes were identified by applying Wald statistic with  $\alpha$  equal to 0.05, followed by FDR  
156 correction with a 5% cut-off. RNA-seq data generated in this study has been submitted to  
157 NCBI GEO (GSE183913).

## 158 2.6. *Gene set enrichment analysis*

159 The hallmark gene sets enriched upon karanjin simulation were identified by  
160 enrichment analysis using fGSEA package in R with FDR correction of 25%. (Sergushichev,  
161 2016). Enrichment plots, and normalized enrichment scores (NES) plots were generated  
162 using additional R packages.

## 163 2.7. *Identification of genes regulated by estrogen, tamoxifen and karanjin.*

164 Curated gene expression dataset corresponding to 1 nM E2 or 1  $\mu$ M tamoxifen  
165 (GSE117942) treatment in MCF-7 cells for 24 hours was obtained from GEO (Guan et al.,  
166 2019). The read count data were analysed using the DESeq2 package in R to identify genes  
167 regulated by 1 nM estrogen or 1  $\mu$ M tamoxifen. The differentially modulated genes were  
168 identified by applying Wald statistic with  $\alpha$  equal to 0.05, followed by FDR correction with a  
169 5% cut-off. They were then compared to the karanjin regulated genes (this study) to generate  
170 sets of overlapping genes depicted in the form of a Venn diagram.

171 2.8. *Total RNA isolation and cDNA synthesis*

172 Total RNA was isolated using RNA extraction reagent prepared in-house. The RNA  
173 integrity was checked by agarose gel electrophoresis and quantified using BioSpectrometer®  
174 (Eppendorf, Hamburg, Germany). Typically, 2 µg of total RNA was reverse transcribed using  
175 High-Capacity cDNA Reverse Transcription kit as per the manufacturer's instructions.

176 2.9. *qRT-PCR*

177 Typically, 2 µl of 1:10 diluted cDNA was used as template for PCR reactions with  
178 gene-specific primers (Supplementary data 2). Cyclophilin A served as an internal control.  
179 Real-time PCRs were carried out in Agilent AriaMx Real-time PCR System (Agilent  
180 technologies, CA, US). The comparative  $\Delta\Delta C_t$  method (Livak and Schmittgen, 2001) was  
181 used for relative quantification of gene expression.

182 2.10. *Western blotting*

183 Total protein was isolated from the phenolic fraction of the RNA extraction reagent.  
184 Alternatively, total protein was extracted using the Laemmli sample buffer. Protein was  
185 quantified by Lowry (Lowry et al., 1951) or TCA (Choi et al., 1993) method, respectively.  
186 Protein was fractionated on 10% SDS-PAGE gel, and transferred to a nitrocellulose  
187 membrane. The blots were probed for with ER $\alpha$ ,  $\beta$ -actin or histone (H3)-specific antibodies  
188 followed by HRP-conjugated anti-rabbit secondary antibody. Chemiluminescence signals  
189 obtained with Clarity Western ECL Substrate (Bio-Rad, California, US, Cat. No. 170-5060)  
190 were captured with ChemiDoc XRS+ system (Bio-Rad, California, US). Histone H3 or  $\beta$ -  
191 actin served as an internal control (Supplementary data 3).



## 192 2.11. *siRNA transfection*

193 MCF-7 cells were seeded in six-well plates. Cells were transfected with siRNA for 24  
194 h using Lipofectamine RNAiMAX transfection reagent according to manufacturer's  
195 instructions. Each well received 25 pmol of scrambled (control) or ER $\alpha$ -specific siRNA.

## 196 2.12. *Statistical analysis*

197 Two-group data were analysed by one-tailed t-tests. Multiple group data were  
198 analysed by one-way ANOVA followed by multiple comparison tests with TukeyHSD. To  
199 study the effect of karanjin concentration on viable cells after 24, or 120 h, and the effect of  
200 ER $\alpha$  knockdown on karanjin-modulated gene expression, the data were analysed by 2 x 2  
201 factorial ANOVA. All statistical analyses were performed using the R statistical package.  
202 Figure-wise raw data, and results of statistical analyses are provided as Supplementary data 4.

## 203 3. Results

### 204 3.1. *Determining the optimal concentration of karanjin*

205 A study of the genome-wide transcriptomic effects of karanjin necessitated the  
206 identification of an optimal concentration, and duration of treatment, which captured direct  
207 and early responses, free from strong mitotic or toxic effects. The short- and long-term effects  
208 of varying concentrations of karanjin on MCF-7 cell viability were analysed. 10 nM E2,  
209 which induces proliferation of MCF-7 cells (Lippman et al., 1976), served as a reference.  
210 MCF-7 cells were treated with 0 to 50  $\mu$ M concentrations of karanjin and viable cells were  
211 recorded after 0 or 24 h. We applied 2 x 2 factorial ANOVA to study the difference in viable  
212 cells after 0 and 24 h (short-term) of treatment as a function of karanjin concentration. There  
213 was no interaction between concentration and time ( $p \approx 1$ ). The effect of time was significant.  
214 The viable cell counts were significantly higher after 24 h of treatment ( $p < 0.0001$ ). There

215 was no effect of concentration. The viable cell counts after 24 h of treatment with all  
216 concentrations of karanjin (0-50  $\mu\text{M}$ ) were not significantly different (Fig. 1A). We  
217 concluded that karanjin had no significant impact on MCF-7 cell viability over a period of 24  
218 h, although proliferation was evident, comparable to that induced by E2 (Fig. 1A).

219 A similar experiment designed to analyse the viable cells after treatment with karanjin  
220 for 0 and 120 h (long-term) revealed a significant interaction between time and concentration.  
221 Although the viable cell counts increased at all concentrations of karanjin as revealed by  
222 significant main effects of time ( $p \approx 0$ ), the number of viable cells after 120 h of treatment  
223 depended on the concentration of karanjin (Fig. 1B,  $p$  value for interaction term  $\approx 0$ ). 10 nM  
224 karanjin treatment yielded significantly higher viable cell count ( $p = 0.002$ ), whereas 10 or 50  
225  $\mu\text{M}$  karanjin yielded significantly lower viable cell counts with respect to control ( $p \approx 0$ ).  
226 Thus, 10  $\mu\text{M}$  karanjin had no effect on MCF-7 cell viability over a period of 24 h, and had an  
227 intermediate effect on viability over a period of 120 h. Based on these results, we studied the  
228 genome-wide alteration in MCF-7 cell transcriptome following short-term (24 h) treatment  
229 with 10  $\mu\text{M}$  karanjin.

### 230 3.2. *RNA-seq analysis*

231 Total RNA isolated from MCF-7 cells treated with DMSO (control) or 10  $\mu\text{M}$  karanjin  
232 were subjected to next generation sequencing (RNA-seq) to identify karanjin-modulated  
233 genes. The RIN values of RNA samples were greater than 9.5 (Supplementary data 5).  
234 Sequencing libraries prepared using the RNA samples were of acceptable quality; all having  
235 Q30 values greater than 95 (Supplementary data 5). Paired-end reads were generated, and the  
236 quality of reads before and after trimming were assessed using FastQC. Less than 1% data  
237 was lost due to trimming (Supplementary data 5). The sequences were aligned with the  
238 human genome build GRCh38 using STAR, and feature read counts files (Supplementary

239 data 6) were analysed using DESeq2. Unsupervised clustering analysis of read count data  
240 from three control (G1, G2, and G3) and three karanjin treated (K1, K2, and K3) samples  
241 revealed that K1 was an outlier (Supplementary data 7). Hence, K1 was omitted from  
242 differential gene expression analysis.

### 243 3.3. *Karanjin regulated genes*

244 We identified karanjin-modulated genes by interrogating the read count data with  
245 DESeq2. The volcano plot in Fig. 2A, shows that 736 genes (blue dots) were modulated by  
246 karanjin, based on a threshold of 0 for LFC, and  $p < 0.05$  for Wald statistic and FDR  
247 (Supplementary Data 8). 362 genes were repressed, and 374 genes were induced by karanjin  
248 as illustrated by Fig. 2B. Among the top 25 induced (Table 1) or repressed genes (Table 2)  
249 were those that encode proteins with diverse functions. These include receptors, signal  
250 transducers, enzymes, enzyme inhibitors, transcription factors, and non-coding RNAs.  
251 Selected genes from Table 1, and 2 were validated by qRT-PCR. As shown in Fig. 2C, the  
252 significant downmodulation of *B3GALT5* ( $n = 3$ ,  $p = 0.009$ ), *BRINP2* ( $n = 4$ ,  $p = 0.002$ ),  
253 *CHST1* ( $n = 3$ ,  $p = 0.002$ ), and *CSTA* ( $n = 3$ ,  $p = 0.002$ ), and significant upregulation of  
254 *CYP1A1* ( $n = 3$ ,  $p = 0.002$ ), *CYP1B1* ( $n = 4$ ,  $p < 0.0001$ ), *MRVII* ( $n = 4$ ,  $p < 0.001$ ), and  
255 *CREG2* ( $n = 4$ ,  $p < 0.0001$ ) following 10  $\mu$ M karanjin treatment is consistent with the  
256 DESeq2 results.

### 257 3.4. *Karanjin modulates G2/M checkpoint, and estrogen-response-early genes*

258 The diversity of genes regulated by karanjin motivated the mining of enriched gene-  
259 sets using fGSEA package. The karanjin-modulated genes were enriched in several hallmark  
260 genesets (Fig 3A), which include G2/M checkpoint, and estrogen-response-early genes. The  
261 enrichment plots for G2/M checkpoint, and estrogen-response-early genes are shown in Fig  
262 3B, and 3C, respectively. The leading-edge genes in the G2/M checkpoint set were *SLC7A5*,

263 *CENPF, CDC25B, UBE2C, MYC, CENPE, KPNA2, AURKA, CKS2, ATRX, CENPA, UBE2S,*  
264 *CCNA2, TPX2, CCNB2, PLK1, HMMR, PTTG1* and *BUB1*. The leading-edge genes in  
265 estrogen-response-early set were *SLC7A5, STC2, TIPARP, TSKU, AREG, CD44* and *TFF1*  
266 (also known as *pS2*). The manner in which karanjin regulated the leading-edge genes within  
267 the two-hallmark gene-sets are shown in Fig. 3D and 3E, respectively.

268 Modulation of selected leading-edge genes from both hallmark gene-sets was  
269 validated by qRT-PCR (Fig. 3F). Among the G2/M checkpoint genes, we confirmed the  
270 induction of *MYC* ( $n = 3, p < 0.001$ ), *CDC25B* ( $n = 3, p = 0.0042$ ), and *CENPF* ( $n = 3, p =$   
271  $0.046$ ). Among estrogen-response-early genes, we confirmed the induction of *TFF1* ( $n = 4, p$   
272  $= 0.019$ ), *CD44* ( $n = 3, p = 0.003$ ), *STC2* ( $n = 3, p = 0.017$ ), and *TIPARP* ( $n = 3, p < 0.001$ ).  
273 *SLC7A5*, which belonged to both hallmark gene-sets, was significantly induced ( $n = 3, p =$   
274  $0.004$ ).

### 275 3.5. *Karanjin-modulated genes overlap with E2- or tamoxifen-modulated genes*

276 The identification and validation of estrogen-response-early genes instigated us to  
277 examine the similarity or differences between genomic effects of karanjin, E2, and tamoxifen,  
278 which is a SERM. Re-analysis of RNA-seq data (GSE117942) of MCF-7 cells treated with 1  
279 nM E2, or 1  $\mu$ M tamoxifen (Guan et al., 2019) yielded two overlapping sets of 3727  
280 estrogen-regulated, and 435 tamoxifen-regulated genes. Karanjin-modulated genes were  
281 matched with those regulated by estrogen or tamoxifen. 419 genes were regulated by karanjin  
282 and estrogen, whereas, 94 genes were regulated by karanjin and tamoxifen. 72 genes were  
283 regulated by estrogen, tamoxifen and karanjin (Fig 4A). Heatmaps in Fig. 4B and 4C show  
284 that karanjin had similar, or opposite effects on estrogen or tamoxifen regulated genes,  
285 respectively. For instance, *STC2, TIPARP, SLC7A5, and AREG* were upregulated, whereas  
286 *CSTA, ADAMTS19, and NCOA3* were downregulated by karanjin and estrogen treatment.

287 *CYP11A1*, *BMF*, and *RET* were regulated by karanjin, and estrogen in opposite directions.  
288 Karanjin also induced similar or opposite effects on genes regulated by tamoxifen. *SLC7A5*,  
289 *FOSL2*, and *PHLDA1* genes were upregulated, whereas *IGFBP4*, *CHRD*, and *PCDH7* were  
290 downregulated by both karanjin and tamoxifen. *GREB1*, *TFF1*, and *CYP11B1* were regulated  
291 by both, albeit in opposite directions (Supplementary data 9).

### 292 3.6. Concentration- and cell type-dependent effect of karanjin on gene expression

293 The effects of varying concentrations of karanjin on the expression of few estrogen-  
294 response-early genes was also addressed in two ER-positive cell lines, namely MCF-7 and  
295 T47D. The experimental design included cells treated with 10 nM E2 as a reference  
296 compound. E2 induces *TFF1* expression in ER-positive breast cancer cells (Brown et al.,  
297 1984). As expected, 10 nM E2 induced *TFF1* mRNA in both the cell lines (Fig. 5A, B; n = 3,  
298 p < 0.001). 10 nM karanjin did not affect *TFF1* mRNA expression in MCF-7 cells. In our  
299 qRT-PCR based validation of RNA-seq data, we had confirmed the significant induction  
300 (~1.2 fold) of *TFF1* mRNA in MCF-7 cells by 10  $\mu$ M karanjin (Fig. 3F). The 1.2-fold  
301 induction of *TFF1* mRNA by 10  $\mu$ M karanjin in Fig. 5A (left panel) is consistent with RNA-  
302 seq data, although one-way ANOVA followed by TukeyHSD does not show significant result.  
303 50  $\mu$ M karanjin significantly induced *TFF1* mRNA expression in MCF-7 (Fig. 5A, left panel,  
304 n = 3, p < 0.001). None of the concentrations of karanjin modulated the expression of *TFF1*  
305 in T47D cells (Fig. 5A, right panel). 10 nM E2 did not affect *TIPARP* mRNA expression in  
306 MCF-7 cells. In agreement with RNA-seq data, 10  $\mu$ M karanjin induced *TIPARP* mRNA  
307 expression (Fig. 5B, left panel; n = 3, p < 0.001). In contrast, 10 nM karanjin repressed its  
308 expression (Fig. 5B, left panel; n = 3, p < 0.01). In T47D cells, 10 nM E2 induced the  
309 expression of *TIPARP* mRNA (Fig. 5B, right panel; n = 3, p < 0.01). Karanjin did not  
310 modulate the expression of *TIPARP* mRNA in T47D cells. *STC2* mRNA, another estrogen-

311 response-early gene, was induced by 10 nM E2 in both cell lines (Fig. 5C,  $n = 3$ ,  $p < 0.001$   
312 for MCF-7 cells,  $p < 0.05$  for T47D). In MCF-7 cells *STC2* mRNA was induced by karanjin  
313 only at a concentration of 10  $\mu$ M (Fig. 5C, left panel,  $n = 3$ ,  $p < 0.01$ ). 10 nM and 50  $\mu$ M  
314 karanjin induced *STC2* mRNA expression more than two-fold (Fig. 5C, left panel). However,  
315 the results were not statistically significant when analysed by ANOVA followed by  
316 TukeyHSD ( $p = 0.07$  for 10 nM, and  $p = 0.09$  for 50  $\mu$ M). None of the concentrations of  
317 karanjin significantly modulated the expression of *STC2* mRNA in T47D cells (Fig. 5C, right  
318 panel). *SLC7A5* mRNA expression was significantly induced by 10 nM E2 in T47D cells (Fig.  
319 5D, right panel,  $n = 3$ ,  $p < 0.001$ ), but not in MCF-7 cell (Fig 5D, left panel). There was  
320 significant induction of *SLC7A5* mRNA expression by 10 and 50  $\mu$ M karanjin (Fig. 5D, left  
321 panel,  $n = 3$ ,  $p < 0.001$  for 10  $\mu$ M, and  $p < 0.01$  for 50  $\mu$ M). None of the concentrations of  
322 karanjin modulated its expression in T47D cells. *CD44* was not modulated by 10 nM E2 in  
323 both cell lines (Fig. 5E). Karanjin induced its expression only in MCF-7 cells at a  
324 concentration of 10  $\mu$ M (Fig. 5E, left panel,  $n = 3$ ,  $p < 0.01$ ). Besides, estrogen-response-  
325 early genes, we also studied the effect of karanjin on the expression of *CSTA*, a known  
326 estrogen suppressed gene (John Mary et al., 2020). As expected, 10 nM E2 suppressed *CSTA*  
327 mRNA expression in MCF-7 cells (Fig. 5F, left panel,  $n = 3$ ,  $p < 0.001$ ). A significant and  
328 progressive dose-dependent suppression of *CSTA* mRNA by karanjin was observed in MCF-7  
329 cells (Fig. 5F,  $n = 3$ ,  $p < 0.001$ ). In T47D cells, 10 nM E2 did not affect *CSTA* mRNA  
330 expression, which is consistent with the previous findings (John Mary et al., 2020). 10 nM  
331 and 10  $\mu$ M karanjin did not modulate *CSTA* mRNA expression in T47D cells. However, in  
332 sharp contrast to MCF-7 cells, 50  $\mu$ M karanjin significantly induced *CSTA* mRNA in T47D  
333 cells (Fig. 5F, right panel,  $p < 0.001$ ). These data demonstrate that karanjin partially mimics  
334 estrogen-like effects on gene expression in a concentration- or cell type-dependent manner.

335 *3.7. Karanjin modulates gene expression via ER $\alpha$  in a gene-dependent manner*

336 Modulation of estrogen-response-early genes led us to hypothesize, the involvement  
337 of ER $\alpha$ , at least in part. Post E2-mediated activation, ER $\alpha$  is typically turned over by  
338 proteasomal degradation (Reid et al., 2003). There was a significant decrease in ER $\alpha$  protein  
339 in MCF-7 cells after treatment with 10  $\mu$ M karanjin for 24 h, which further decreased with  
340 time (Fig. 6A). Thus, post karanjin stimulation, the fate of ER $\alpha$  is similar to that brought  
341 about by estrogen.

342 To gather more evidences for the involvement of ER $\alpha$ , we examined the effect of ER $\alpha$   
343 knockdown on karanjin-mediated modulation of gene expression. qRT-PCR was applied to  
344 analyse the expression of selected karanjin-modulated genes in MCF-7 cells, which were  
345 treated with vehicle or 10  $\mu$ M karanjin after prior treatment with scrambled or ER $\alpha$ -specific  
346 siRNA. As shown in Fig. 6B, ER $\alpha$  protein was undetectable in cells treated with ER $\alpha$ -specific  
347 siRNA. Gene expression data were analysed by 2 x 2 factorial ANOVA to test the effect of  
348 karanjin treatment as a function of ER $\alpha$  status. We first analysed the expression levels of *PR*  
349 and *TFF1* mRNAs. These genes are ER $\alpha$ -dependent classical estrogen-induced genes, whose  
350 expression are significantly reduced upon ER $\alpha$  knockdown (Brown et al., 1984; John Mary et  
351 al., 2017; Kumar et al., 2021; Nardulli et al., 1988). As expected, a significant main effect of  
352 ER $\alpha$  was observed on *PR* mRNA levels in MCF-7 cells (Fig. 6C,  $p \approx 0$ ). However, there was  
353 no evidence for an interaction between karanjin and ER $\alpha$  ( $p = 0.98$ ). Irrespective of the ER $\alpha$   
354 status, karanjin did not modulate the levels of *PR* mRNA. This result is not surprising, since  
355 our RNA-seq experiment did not reveal *PR* mRNA modulation by karanjin. A similar result  
356 was obtained for *TFF1*. There was no interaction between karanjin and ER $\alpha$  ( $p = 0.485$ ), but  
357 there was a significant main effect of ER $\alpha$  (Fig. 6D,  $p < 0.001$ ). Karanjin induced *TFF1*  
358 mRNA levels by 1.2-fold in cells treated with scrambled siRNA. However, this induction was  
359 not significant after multiple comparison, although the induction is comparable to that  
360 significant induction inferred from the RNA-seq data (Fig. 3F). In case of *CSTA* mRNA,

361 there was no evidence for the interaction between karanjin and ER $\alpha$  (Fig. 6E,  $p = 0.37$ ).  
362 However, there were significant main effects of karanjin treatment ( $p = 0.007$ ), and ER $\alpha$  ( $p \approx$   
363 0). In contrast, analysis of *ADAMTS19* revealed that there was a significant interaction  
364 between karanjin and ER $\alpha$  (Fig. 6F,  $p = 0.02$ ). Karanjin treatment significantly reduced  
365 *ADAMTS19* mRNA in scrambled siRNA treated cells, but not in ER $\alpha$  siRNA treated cells. We  
366 also analysed the mRNA expression of other estrogen-response early genes, such as *STC2*,  
367 *SLC7A5*, and *TIPARP*. For *STC2* and *SLC7A5*, a significant interaction between karanjin and  
368 ER $\alpha$  (Fig. 6G, H;  $p < 0.001$ ) was found; the induction in mRNA expression by karanjin being  
369 greater in cells treated with scrambled siRNA compared to ER $\alpha$ -specific siRNA. In case of  
370 *TIPARP* only the main effect of karanjin was significant (Fig. 6I,  $p < 0.001$ ). We also  
371 analysed *CYP11A1* mRNA expression, which does not fall under the estrogen-response-early  
372 gene set. There was a modest but significant interaction between karanjin and ER $\alpha$  (Fig. 6J,  $p$   
373  $= 0.042$ ), with significant main effects of karanjin ( $p < 0.001$ ) and ER $\alpha$  ( $p = 0.03$ ).

#### 374 4. Discussion

375 Karanjin is a bioactive compound, with anti-hyperglycaemic (Tamrakar et al., 2008),  
376 anti-inflammatory (Bose et al., 2014), anti-ulcer (Vismaya et al., 2011), and anti-colitis (Patel  
377 and Trivedi, 2017) effects *in vivo*, and anti-proliferative (Guo et al., 2015; Raghav et al., 2019;  
378 Roy et al., 2019), cell cycle inhibitory (Guo et al., 2015; Roy et al., 2019), ROS limiting (Roy  
379 et al., 2019), and glucose-uptake inducing effects *in vitro* (Jaiswal et al., 2011). Its molecular  
380 effects include inhibition of TNF $\alpha$  production, modulation of NF- $\kappa$ B activity (Bose et al.,  
381 2014), GLUT-4 translocation, protein phosphorylation, protein kinase activation (Jaiswal et  
382 al., 2011), enzyme inhibition (Joshi et al., 2018), and interference with transporters  
383 (Michaelis et al., 2014). However, the genomic correlates of these effects were unknown.  
384 This study explored the genome-wide alteration of gene expression at the mRNA level in



385 MCF-7 cells, using next generation sequencing. The transcriptomic- or gene-modulatory  
386 footprint of karanjin encompasses a multitude of cellular processes, such as metabolism  
387 (glycolysis, fatty acid, and xenobiotic), signalling (TNF $\alpha$ , KRAS), ROS-scavenging,  
388 unfolded protein response, modulation of transcription factor targets (E2F and MYC), and  
389 hormonal response (androgen, and estrogen response early).

390 Various research groups have previously demonstrated *in vitro* effects of karanjin over  
391 a wide concentration range. We found no evidence for any short-term (24 h) effect of karanjin  
392 (0-50  $\mu$ M) on MCF-7 viable cell count. However, long-term (120 h) effect was significantly  
393 concentration-dependent, although the viable cell count increased at all concentrations of  
394 karanjin. Viable count was significantly lower at higher concentrations (10 and 50  $\mu$ M),  
395 whereas it was, modestly, but significantly higher at lower concentration (10 nM). These data  
396 suggest that the anti-proliferative effect of karanjin may not be universal, but rather be cell-  
397 and concentration-dependent. This presents a caveat to the anticancer potential of karanjin,  
398 and underscore the importance of dosage for various healthcare applications suggested in the  
399 literature.

400 The RNA-seq data, from the 24 h experiment, capture the early effects of karanjin.  
401 Since the viability of MCF-7 cells treated for 24 h with 10  $\mu$ M karanjin is as good as vehicle,  
402 the changes in gene expression reflected in RNA-seq data should be free from those  
403 associated with proliferation or toxicity. In this context, the enrichment of G2/M checkpoint  
404 genes among those modulated by karanjin is worthy of attention, as it generates  
405 contradictions. The enrichment of G2/M checkpoint genes appears to contradict the  
406 observation that none of the concentrations of karanjin resulted in significantly different  
407 viable counts compared to vehicle treated control, in 24 h. Furthermore, 10  $\mu$ M karanjin  
408 modulated the G2/M checkpoint genes in a manner that is consistent with cell cycle  
409 progression, rather than cell cycle arrest. For example, *SLC7A5*, a sodium-independent

410 transporter is one of the karanjin induced genes. It is an amino acid exchanger that maintains  
411 intracellular levels of leucine, an established master regulator of the mTORC1 pathway, and  
412 overtly expressed in a variety of cancers (El Ansari et al., 2018). *MYC* is a proto-oncogene  
413 that encodes a nuclear phosphoprotein. The regulation of *MYC* expression in cells is closely  
414 linked with cell proliferation. Elevated expression of *MYC* promotes the activation of cyclins  
415 and CDKs, and impairs the functionality of cell cycle inhibitors (Miller et al., 2012).  
416 *CDC25B* is a *MYC* target (Zörnig and Evan, 1996). It facilitates entry of cells into mitosis  
417 by dephosphorylating cell dependent kinase-CDC2 (Lammer et al., 1998). Induction of the  
418 selected G2/M checkpoint genes by 10  $\mu$ M karanjin contradicts the observation that over a  
419 period of 120 h, 10  $\mu$ M karanjin treatment results in significantly lesser viable counts  
420 compared to control. Furthermore, it contradicts other reports of cell cycle arrest and  
421 apoptosis (Guo et al., 2015; Roy et al., 2019).

422 Here we present possible explanations behind the contradictions. Although 10  $\mu$ M  
423 karanjin treatment for 24 or 120 h produces similar, or significantly lower viable counts,  
424 respectively, compared to control, proliferation of cells is evident from a significant (1.55-  
425 fold and 5.9-fold, respectively) increase compared to baseline (0 h) viable count. The cells  
426 could not have proliferated without cell cycle progression. In the event of cell cycle arrest  
427 followed by apoptosis, the viable counts are expected to go below the baseline. Thus, it is  
428 possible, that at 10  $\mu$ M, karanjin delays cell cycle progression rather than induce arrest. The  
429 delay could be due to other yet unknown effects of karanjin. It is to be noted that even at 50  
430  $\mu$ M, there is proliferation of cells, although the final viable count after 120 h is even lower  
431 than that resulting from 10  $\mu$ M. On the other hand, 10 nM karanjin results in significantly  
432 more viable count compared to control. The concentration dependent effect indicates that  
433 there is more than one receptor for karanjin in MCF-7 cells. The high affinity receptors could

434 be responsible for proliferative actions of karanjin at lower concentrations. Whereas, low  
435 affinity receptors could be responsible for cell cycle arrest at high concentrations.

436 In some studies, conclusions about anti-proliferative effects of karanjin were based on  
437 MTT assays, which are end-point assays. This obscures the initial viability at the start of the  
438 experiment, which makes it difficult to conclude whether the treatment caused cell death or  
439 cell cycle arrest. This distinction is possible with trypan blue dye exclusion assay.  
440 Furthermore, mechanisms of cell cycle arrest, and pro-apoptotic effects of karanjin, were  
441 shown in HeLa, Hep G2, A549, and HL-60, but not in MCF-7 cells (Guo et al., 2015; Roy et  
442 al., 2019). Thus, the apparent contradictions could be due to the intrinsic properties of MCF-7  
443 cells.

444 Enrichment of estrogen-response-early genes and overlap of karanjin modulated genes  
445 with those regulated by 1 nM E2 or 1  $\mu$ M tamoxifen suggest partial estrogen like effects of  
446 karanjin. Enhanced ER $\alpha$  protein turnover following karanjin treatment, and the negative  
447 impact of ER $\alpha$  knockdown on karanjin-mediated alteration of gene expression provide  
448 enticing evidences in favour of ER $\alpha$  mediated actions of karanjin. It remains to be seen  
449 whether karanjin directly binds ER $\alpha$ . However, it is possible, given the flavonoid structure of  
450 SERMs (Rosenberg Zand et al., 2000). They have cell-type and concentration dependent  
451 effects on proliferation (Wang et al., 1996) and gene expression in hormone responsive cells  
452 (Diel et al., 2001; Lavigne et al., 2008). It is possible that karanjin may have SERM-like  
453 activity since our study shows that karanjin not only enhances ER $\alpha$  protein turnover, but also  
454 exerts concentration-, gene-, and cell-type-dependent effect on gene expression. This  
455 selectivity can potentially be attributed to the differential recruitment of co-activators or co-  
456 repressors on karanjin-ER-complex at target gene promoters. ER $\alpha$  plays a central role in  
457 estrogen-mediated proliferation of breast cancer cells. The partial estrogen-like or SERM-like

458 activity of karanjin could underlie the concentration dependent effect on MCF-7 cell  
459 proliferation. The compromised proliferation of MCF-7 cells treated with 10  $\mu$ M karanjin in  
460 the face of induced expression of estrogen-response-early genes could be due to the  
461 additional effects of karanjin mediated via non-ER $\alpha$  targets. Thus, the present study provides  
462 a valuable insight into the hitherto unexplored effects of karanjin on endocrine responsive  
463 cells. The caveat exposed by the data with respect to the anticancer potential of karanjin  
464 cannot be overlooked.

465 In summary, karanjin affects proliferation of MCF-7 cells in a concentration  
466 dependent manner. 10  $\mu$ M karanjin induces genome-wide alteration in MCF-7 cell  
467 transcriptome, which likely impacts diverse cellular processes including G2/M transition and  
468 early estrogen responses. It modulates gene expression in the ER $\alpha$ -positive cell lines in a  
469 manner that suggests SERM-like activity. The findings call for an in-depth investigation into  
470 karanjin's effects on breast cancer cells and the mechanisms, particularly the involvement of  
471 ER $\alpha$ , before considering its usage in breast cancer therapy. This study, while exposing a  
472 caveat to the anticancer potential of karanjin, will inspire further investigations into the  
473 possible use of karanjin or its derivatives in endocrine therapies.

#### 474 **CRedit authorship contribution statement**

475 **Gaurav Bhatt:** Data curation, Investigation. **Akshita:** Data curation, In-silico investigation.

476 **Latha Rangan:** Conceptualization, Supervision. **Anil Mukund Limaye:** Conceptualization,

477 Supervision, Validation, Writing - review & editing.

478 **Conflict of interest statement**

479 There is no conflict of interest.

480 **Acknowledgments**

481 The work was funded by a core research grant from the Department of Science and  
482 Technology, Govt. of India (CRG/2020/002109). Infrastructural support from the Department  
483 of Biosciences and Bioengineering, IIT Guwahati. is acknowledged. GB, and AG  
484 acknowledge the fellowship from IIT Guwahati. Technical support received from Mr. Debojit  
485 Bhattacharjee regarding HRMS is acknowledged. The authors thank Prathibha Ranganathan  
486 for critical reading of the manuscript.

487 **References**

- 488 Andrews, S., Krueger, F., Seifried-Pichon, A., Biggin, F., Wingett, S., 2015. FastQC. A  
489 quality control tool for high throughput sequence data. Babraham Bioinformatics  
490 <http://www.bioinformatics.babraham.ac.uk/projects/fastqc/>,2010 (accessed 1.25.21).
- 491 Bolger, A.M., Lohse, M., Usadel, B., 2014. Trimmomatic: a flexible trimmer for Illumina  
492 sequence data. *Bioinformatics* 30, 2114–20.  
493 <https://doi.org/10.1093/bioinformatics/btu170>
- 494 Bose, M., Chakraborty, M., Bhattacharya, S., Bhattacharjee, P., Mandal, S., Kar, M., Mishra,  
495 R., n.d. Suppression of NF- $\kappa$ B p65 nuclear translocation and tumor necrosis factor- $\alpha$  by  
496 *Pongamia pinnata* seed extract in adjuvant-induced arthritis. *J. Immunotoxicol.* 11, 222–  
497 30. <https://doi.org/10.3109/1547691X.2013.824931>
- 498 Bose, M., Chakraborty, M., Bhattacharya, S., Mukherjee, D., Mandal, S., Mishra, R., 2014.  
499 Prevention of arthritis markers in experimental animal and inflammation signalling in  
500 macrophage by Karanjin isolated from *Pongamia pinnata* seed extract. *Phytother. Res.*

501 28, 1188–95. <https://doi.org/10.1002/ptr.5113>

502 Brown, A.M., Jeltsch, J.M., Roberts, M., Chambon, P., 1984. Activation of pS2 gene  
503 transcription is a primary response to estrogen in the human breast cancer cell line MCF-  
504 7. *Proc. Natl. Acad. Sci. U. S. A.* 81, 6344–8. <https://doi.org/10.1073/pnas.81.20.6344>

505 Choi, S.Y., Ha, T.Y., Ahn, J.Y., Kim, S.R., Kang, K.S., Hwang, I.K., Kim, S., 2008.  
506 Estrogenic activities of isoflavones and flavones and their structure-activity relationships.  
507 *Planta Med.* 74, 25–32. <https://doi.org/10.1055/s-2007-993760>

508 Choi, W.S., Chung, K.J., Chang, M.S., Chun, J.K., Lee, H.W., Hong, S.Y., 1993. A  
509 turbidimetric determination of protein by trichloroacetic acid. *Arch. Pharm. Res.* 16, 57–  
510 61. <https://doi.org/10.1007/BF02974129>

511 Constantinou, A.I., Krygier, A.E., Mehta, R.R., 1998. Genistein induces maturation of  
512 cultured human breast cancer cells and prevents tumor growth in nude mice. *Am. J. Clin.*  
513 *Nutr.* 68, 1426S-1430S. <https://doi.org/10.1093/ajcn/68.6.1426S>

514 Diel, P., Olf, S., Schmidt, S., Michna, H., 2001. Molecular identification of potential  
515 selective estrogen receptor modulator (SERM) like properties of phytoestrogens in the  
516 human breast cancer cell line MCF-7. *Planta Med.* 67, 510–4. [https://doi.org/10.1055/s-](https://doi.org/10.1055/s-2001-16474)  
517 [2001-16474](https://doi.org/10.1055/s-2001-16474)

518 Dobin, A., Davis, C.A., Schlesinger, F., Drenkow, J., Zaleski, C., Jha, S., Batut, P., Chaisson,  
519 M., Gingeras, T.R., 2013. STAR: ultrafast universal RNA-seq aligner. *Bioinformatics* 29,  
520 15–21. <https://doi.org/10.1093/bioinformatics/bts635>

521 El Ansari, R., Craze, M.L., Miligy, I., Diez-Rodriguez, M., Nolan, C.C., Ellis, I.O., Rakha,  
522 E.A., Green, A.R., 2018. The amino acid transporter SLC7A5 confers a poor prognosis  
523 in the highly proliferative breast cancer subtypes and is a key therapeutic target in  
524 luminal B tumours. *Breast Cancer Res.* 20, 21. [https://doi.org/10.1186/s13058-018-](https://doi.org/10.1186/s13058-018-0946-6)  
525 [0946-6](https://doi.org/10.1186/s13058-018-0946-6)

- 526 Fioravanti, L., Cappelletti, V., Miodini, P., Ronchi, E., Brivio, M., Di Fronzo, G., 1998.  
527 Genistein in the control of breast cancer cell growth: insights into the mechanism of  
528 action in vitro. *Cancer Lett.* 130, 143–52. [https://doi.org/10.1016/s0304-3835\(98\)00130-](https://doi.org/10.1016/s0304-3835(98)00130-x)  
529 x
- 530 Fotsis, T., Pepper, M.S., Aktas, E., Breit, S., Rasku, S., Adlercreutz, H., Wähälä, K.,  
531 Montesano, R., Schweigerer, L., 1997. Flavonoids, dietary-derived inhibitors of cell  
532 proliferation and in vitro angiogenesis. *Cancer Res.* 57, 2916–21.
- 533 Guan, J., Zhou, W., Hafner, M., Blake, R.A., Chalouni, C., Chen, I.P., De Bruyn, T., Giltane,  
534 J.M., Hartman, S.J., Heidersbach, A., Houtman, R., Ingalla, E., Kategaya, L., Kleinheinz,  
535 T., Li, J., Martin, S.E., Modrusan, Z., Nannini, M., Oeh, J., Ubhayakar, S., Wang, X.,  
536 Wertz, I.E., Young, A., Yu, M., Sampath, D., Hager, J.H., Friedman, L.S., Daemen, A.,  
537 Metcalfe, C., 2019. Therapeutic Ligands Antagonize Estrogen Receptor Function by  
538 Impairing Its Mobility. *Cell* 178, 949-963.e18. <https://doi.org/10.1016/j.cell.2019.06.026>
- 539 Guo, J.R., Chen, Q.Q., Wai-Kei Lam, C., Zhang, W., 2015. Effects of karanjin on cell cycle  
540 arrest and apoptosis in human A549, HepG2 and HL-60 cancer cells. *Biol. Res.* 48.  
541 <https://doi.org/10.1186/s40659-015-0031-x>
- 542 Haddad, A.Q., Venkateswaran, V., Viswanathan, L., Teahan, S.J., Fleshner, N.E., Klotz, L.H.,  
543 2006. Novel antiproliferative flavonoids induce cell cycle arrest in human prostate  
544 cancer cell lines. *Prostate Cancer Prostatic Dis.* 9, 68–76.  
545 <https://doi.org/10.1038/sj.pcan.4500845>
- 546 Hong, H., Branham, W.S., Ng, H.W., Moland, C.L., Dial, S.L., Fang, H., Perkins, R., Sheehan,  
547 D., Tong, W., 2015. Human sex hormone-binding globulin binding affinities of 125  
548 structurally diverse chemicals and comparison with their binding to androgen receptor,  
549 estrogen receptor, and  $\alpha$ -fetoprotein. *Toxicol. Sci.* 143, 333–48.  
550 <https://doi.org/10.1093/toxsci/kfu231>

- 551 Hsu, J.T., Hung, H.C., Chen, C.J., Hsu, W.L., Ying, C., 1999. Effects of the dietary  
552 phytoestrogen biochanin A on cell growth in the mammary carcinoma cell line MCF-7. *J.*  
553 *Nutr. Biochem.* 10, 510–7. [https://doi.org/10.1016/s0955-2863\(99\)00037-6](https://doi.org/10.1016/s0955-2863(99)00037-6)
- 554 Jaiswal, N., Yadav, P.P., Maurya, R., Srivastava, A.K., Tamrakar, A.K., 2011. Karanjin from  
555 *Pongamia pinnata* induces GLUT4 translocation in skeletal muscle cells in a  
556 phosphatidylinositol-3-kinase-independent manner. *Eur. J. Pharmacol.* 670, 22–8.  
557 <https://doi.org/10.1016/j.ejphar.2011.08.049>
- 558 John Mary, D.J.S., Manjegowda, M.C., Kumar, A., Dutta, S., Limaye, A.M., 2017. The role  
559 of cystatin A in breast cancer and its functional link with ER $\alpha$ . *J. Genet. Genomics* 44,  
560 593–597. <https://doi.org/10.1016/j.jgg.2017.10.001>
- 561 John Mary, D.J.S., Sikarwar, G., Kumar, A., Limaye, A.M., 2020. Interplay of ER $\alpha$  binding  
562 and DNA methylation in the intron-2 determines the expression and estrogen regulation  
563 of cystatin A in breast cancer cells. *Mol. Cell. Endocrinol.* 504, 110701.  
564 <https://doi.org/10.1016/j.mce.2020.110701>
- 565 Joshi, P., Sonawane, V.R., Williams, I.S., McCann, G.J.P., Gatchie, L., Sharma, R., Satti, N.,  
566 Chaudhuri, B., Bharate, S.B., 2018. Identification of karanjin isolated from the Indian  
567 beech tree as a potent CYP1 enzyme inhibitor with cellular efficacy: Via screening of a  
568 natural product repository. *Medchemcomm* 9, 371–382.  
569 <https://doi.org/10.1039/c7md00388a>
- 570 Kumar, A., Dhillon, A., Manjegowda, M.C., Singh, N., Mary, D.J.S.J., Kumar, S., Modi, D.,  
571 Limaye, A.M., 2021. Estrogen suppresses HOXB2 expression via ER $\alpha$  in breast cancer  
572 cells. *Gene* 794, 145746. <https://doi.org/10.1016/j.gene.2021.145746>
- 573 Lammer, C., Wagerer, S., Saffrich, R., Mertens, D., Ansorge, W., Hoffmann, I., 1998. The  
574 cdc25B phosphatase is essential for the G2/M phase transition in human cells. *J. Cell Sci.*  
575 111, 2445–2453. <https://doi.org/10.1242/jcs.111.16.2445>



- 576 Lavigne, J.A., Takahashi, Y., Chandramouli, G.V.R., Liu, H., Perkins, S.N., Hursting, S.D.,  
577 Wang, T.T.Y., 2008. Concentration-dependent effects of genistein on global gene  
578 expression in MCF-7 breast cancer cells: an oligo microarray study. *Breast Cancer Res.*  
579 *Treat.* 110, 85–98. <https://doi.org/10.1007/s10549-007-9705-6>
- 580 Liao, Y., Smyth, G.K., Shi, W., 2014. featureCounts: an efficient general purpose program for  
581 assigning sequence reads to genomic features. *Bioinformatics* 30, 923–30.  
582 <https://doi.org/10.1093/bioinformatics/btt656>
- 583 Lippman, M., Bolan, G., Huff, K., 1976. The effects of estrogens and antiestrogens on  
584 hormone-responsive human breast cancer in long-term tissue culture. *Cancer Res.* 36,  
585 4595–601.
- 586 Livak, K.J., Schmittgen, T.D., 2001. Analysis of relative gene expression data using real-time  
587 quantitative PCR and the  $2^{-(\Delta\Delta C(T))}$  Method. *Methods* 25, 402–8.  
588 <https://doi.org/10.1006/meth.2001.1262>
- 589 Love, M.I., Huber, W., Anders, S., 2014. Moderated estimation of fold change and dispersion  
590 for RNA-seq data with DESeq2. *Genome Biol.* 15, 550. [https://doi.org/10.1186/s13059-](https://doi.org/10.1186/s13059-014-0550-8)  
591 [014-0550-8](https://doi.org/10.1186/s13059-014-0550-8)
- 592 Lowry, O.H., Rosebrough, N.J., Farr, A.L., Randall, R.J., 1951. Protein measurement with the  
593 Folin phenol reagent. *J. Biol. Chem.* 193, 265–275. [https://doi.org/10.1016/s0021-](https://doi.org/10.1016/s0021-9258(19)52451-6)  
594 [9258\(19\)52451-6](https://doi.org/10.1016/s0021-9258(19)52451-6)
- 595 Maggiolini, M., Bonofiglio, D., Marsico, S., Panno, M.L., Cenni, B., Picard, D., Andò, S.,  
596 2001. Estrogen receptor alpha mediates the proliferative but not the cytotoxic dose-  
597 dependent effects of two major phytoestrogens on human breast cancer cells. *Mol.*  
598 *Pharmacol.* 60, 595–602.
- 599 Memariani, Z., Abbas, S.Q., ul Hassan, S.S., Ahmadi, A., Chabra, A., 2021. Naringin and  
600 naringenin as anticancer agents and adjuvants in cancer combination therapy: Efficacy

- 601 and molecular mechanisms of action, a comprehensive narrative review. *Pharmacol. Res.*  
602 171, 105264. <https://doi.org/10.1016/j.phrs.2020.105264>
- 603 Michaelis, M., Rothweiler, F., Nerreter, T., Sharifi, M., Ghafourian, T., Cinatl, J., 2014.  
604 Karanjin interferes with ABCB1, ABCC1, and ABCG2. *J. Pharm. Pharm. Sci.* 17, 92–  
605 105. <https://doi.org/10.18433/j3bw2s>
- 606 Miller, D.M., Thomas, S.D., Islam, A., Muench, D., Sedoris, K., 2012. c-Myc and cancer  
607 metabolism. *Clin. Cancer Res.* 18, 5546–5553. [https://doi.org/10.1158/1078-0432.CCR-](https://doi.org/10.1158/1078-0432.CCR-12-0977)  
608 12-0977
- 609 Nardulli, A.M., Greene, G.L., O'Malley, B.W., Katzenellenbogen, B.S., 1988. Regulation of  
610 progesterone receptor messenger ribonucleic acid and protein levels in MCF-7 cells by  
611 estradiol: analysis of estrogen's effect on progesterone receptor synthesis and  
612 degradation. *Endocrinology* 122, 935–44. <https://doi.org/10.1210/endo-122-3-935>
- 613 Park, K. Il, Park, H.S., Nagappan, A., Hong, G.E., Lee, D.H., Kang, S.R., Kim, J.A., Zhang,  
614 J., Kim, E.H., Lee, W.S., Shin, S.C., Hah, Y.S., Kim, G.S., 2012. Induction of the cell  
615 cycle arrest and apoptosis by flavonoids isolated from Korean *Citrus aurantium* L. in  
616 non-small-cell lung cancer cells. *Food Chem.* 135, 2728–35.  
617 <https://doi.org/10.1016/j.foodchem.2012.06.097>
- 618 Patel, P.P., Trivedi, N.D., 2017. Effect of karanjin on 2,4,6-trinitrobenzenesulfonic acid-  
619 induced colitis in Balb/c mice. *Indian J. Pharmacol.* 49, 161–167.  
620 [https://doi.org/10.4103/ijp.IJP\\_234\\_15](https://doi.org/10.4103/ijp.IJP_234_15)
- 621 Raghav, D., Mahanty, S., Rathinasamy, K., 2019. Biochemical and toxicological investigation  
622 of karanjin, a bio-pesticide isolated from *Pongamia* seed oil. *Pestic. Biochem. Physiol.*  
623 157, 108–121. <https://doi.org/10.1016/j.pestbp.2019.03.011>
- 624 Reid, G., Hübner, M.R., Métivier, R., Brand, H., Denger, S., Manu, D., Beaudouin, J.,  
625 Ellenberg, J., Gannon, F., 2003. Cyclic, proteasome-mediated turnover of unliganded

- 626 and liganded ER $\alpha$  on responsive promoters is an integral feature of estrogen signaling.  
627 Mol. Cell 11, 695–707. [https://doi.org/10.1016/S1097-2765\(03\)00090-X](https://doi.org/10.1016/S1097-2765(03)00090-X)
- 628 Rosenberg Zand, R.S., Jenkins, D.J.A., Diamandis, E.P., 2000. Steroid hormone activity of  
629 flavonoids and related compounds. Breast Cancer Res. Treat. 62, 35–49.  
630 <https://doi.org/10.1023/A:1006422302173>
- 631 Roy, R., Pal, D., Sur, S., Mandal, S., Saha, P., Panda, C.K., 2019. Pongapin and Karanjin,  
632 furanoflavanoids of Pongamia pinnata, induce G2/M arrest and apoptosis in cervical  
633 cancer cells by differential reactive oxygen species modulation, DNA damage, and  
634 nuclear factor kappa-light-chain-enhancer of activated B cell signal. Phyther. Res. 33,  
635 1084–1094. <https://doi.org/10.1002/ptr.6302>
- 636 Sergushichev, A.A., 2016. An algorithm for fast preranked gene set enrichment analysis using  
637 cumulative statistic calculation. bioRxiv 060012.
- 638 Singh, A., Bhatt, G., Gujre, N., Mitra, S., Swaminathan, R., Limaye, A.M., Rangan, L., 2021.  
639 Karanjin. Phytochemistry 183, 112641.  
640 <https://doi.org/10.1016/j.phytochem.2020.112641>
- 641 Singh, A., Jahan, I., Sharma, M., Rangan, L., Khare, A., Panda, A., 2016. Structural  
642 Characterization, In Silico Studies and In Vitro Antibacterial Evaluation of a  
643 Furanoflavonoid from Karanj. Planta Medica Lett. 3, e91–e95. [https://doi.org/10.1055/s-](https://doi.org/10.1055/s-0042-105159)  
644 0042-105159
- 645 Singh, S., Meena, A., Luqman, S., 2021. Baicalin mediated regulation of key signaling  
646 pathways in cancer. Pharmacol. Res. 164, 105387.  
647 <https://doi.org/10.1016/j.phrs.2020.105387>
- 648 Strober, W., 2001. Trypan blue exclusion test of cell viability. Curr. Protoc. Immunol.  
649 Appendix 3, Appendix 3B. <https://doi.org/10.1002/0471142735.ima03bs21>
- 650 Tamrakar, A.K., Yadav, P.P., Tiwari, P., Maurya, R., Srivastava, A.K., 2008. Identification of

- 651 pongamol and karanjin as lead compounds with antihyperglycemic activity from  
652 *Pongamia pinnata* fruits. *J. Ethnopharmacol.* 118, 435–9.  
653 <https://doi.org/10.1016/j.jep.2008.05.008>
- 654 Vismaya, Belagihally, S.M., Rajashekhar, S., Jayaram, V.B., Dharmesh, S.M., Thirumakudalu,  
655 S.K.C., 2011. Gastroprotective Properties of Karanjin from Karanja (*Pongamia pinnata*)  
656 Seeds; Role as Antioxidant and H, K-ATPase Inhibitor. *Evid. Based. Complement.*  
657 *Alternat. Med.* 2011, 747246. <https://doi.org/10.1093/ecam/neq027>
- 658 Wang, T.T.Y., Sathyamoorthy, N., Phang, J.M., 1996. Molecular effects of genistein on  
659 estrogen receptor mediated pathways. *Carcinogenesis* 17, 271–275.  
660 <https://doi.org/10.1093/carcin/17.2.271>
- 661 Xu, R., Zhang, Y., Ye, X., Xue, S., Shi, J., Pan, J., Chen, Q., 2013. Inhibition effects and  
662 induction of apoptosis of flavonoids on the prostate cancer cell line PC-3 in vitro. *Food*  
663 *Chem.* 138, 48–53. <https://doi.org/10.1016/j.foodchem.2012.09.102>
- 664 Yang, S., Zhou, Q., Yang, X., 2007. Caspase-3 status is a determinant of the differential  
665 responses to genistein between MDA-MB-231 and MCF-7 breast cancer cells. *Biochim.*  
666 *Biophys. Acta* 1773, 903–11. <https://doi.org/10.1016/j.bbamcr.2007.03.021>
- 667 Zava, D.T., Duwe, G., 1997. Estrogenic and antiproliferative properties of genistein and other  
668 flavonoids in human breast cancer cells in vitro. *Nutr. Cancer* 27, 31–40.  
669 <https://doi.org/10.1080/01635589709514498>
- 670 Zörnig, M., Evan, G.I., 1996. Cell cycle: On target with Myc. *Curr. Biol.* 6, 1553–1556.  
671 [https://doi.org/10.1016/S0960-9822\(02\)70769-0](https://doi.org/10.1016/S0960-9822(02)70769-0)

672

673

674

675

676 **Figure Legends**

677 **Fig. 1.** Concentration dependent effect of short- (A) or long-term (B) stimulation with  
678 karanjin on MCF-7 cell viability.  $4 \times 10^4$  MCF-7 cells were seeded in 35 mm dishes and  
679 grown in M1 medium for a period of 36 h. The cells were then shifted to M2 medium and  
680 incubated for 3 h. Thereafter, the cells were treated with vehicle, or indicated concentrations  
681 of karanjin. After 24 (A) or 120 h (B) the viable cells were counted (blue dots) based on  
682 trypan blue dye exclusion using a hemocytometer. Cells treated for 0 h provided the initial  
683 viable counts for each treatment group (red dots). In the 120-h experiment (B), the treatment  
684 medium was replenished every 48 h. Each dot represents mean viable count  $\pm$  sd ( $n = 3$ ). The  
685 data were analysed by  $2 \times 2$  factorial ANOVA to test whether the increase in viable count  
686 after 24 (A) or 120 h (B) was dependent on concentration of karanjin. 10 nM E2 treatment  
687 was used as a reference, and was not a part of the statistical analysis. Asterisks represent  
688 significant result with respect to control for 120 h data. (\*\* $p < 0.01$ , \*\*\* $p < 0.001$ ).  $p_{\text{time}}$ , and  
689  $p_{\text{conc}}$  are p values for main effects of time, and concentration respectively.  $p_{\text{conc:time}}$  is the p  
690 value for the interaction.

691 **Fig. 2.** Summary of the RNA-seq data. A. Volcano plot. Each point represents a gene, which  
692 is plotted according to its  $-\log_{10}P_{\text{adj}}$  and  $\log_2\text{FC}$ . The blue dots represent genes ( $n = 736$ ) that  
693 are significantly modulated by 10  $\mu\text{M}$  karanjin. The red dots represent non-significant genes.  
694 B. Expression heatmap of 736 significantly modulated genes. G1, G2 and G3 are control  
695 samples. K2 and K3 are karanjin treated samples. The color for each gene on the heatmap  
696 represents its log-normalized count. C. Validation. Total RNA isolated from MCF-7 cells  
697 treated with vehicle or karanjin (10  $\mu\text{M}$ ) for a period of 24 h was subjected to qRT-PCR  
698 analysis of the indicated genes chosen from Table 1, and 2. The  $\Delta\Delta\text{Ct}$  method was used for  
699 analysing the qRT-PCR data. The experiment had three replicated dishes of control or

700 karanjin treated cells. The expression in one control sample was set to 1 and those determined  
701 for the others were expressed relative to control. Bars represent mean relative expression  $\pm$  sd  
702 (n = 3). For each gene the data were analysed by one-tailed t-tests. Asterisks represent  
703 significant result. (\*\*p < 0.01, \*\*\*p < 0.001).

704 **Fig. 3.** Gene set enrichment analysis. A. Bar chart showing the fGSEA results. The fGSEA  
705 package in R was used to analyse the RNA-seq data to identify the enriched hallmark gene  
706 sets in MCF-7 cells following 10 $\mu$ M karanjin treatment. Bars represent NES. Blue bars  
707 correspond to the significantly enriched gene sets based on a FDR cut-off 25%. The number  
708 of leading-edge genes in each gene set is indicated beside the bars. B, C. Enrichment plots for  
709 G2/M checkpoint, and estrogen-response-early genes, respectively. D, E. The pattern of  
710 expression of leading-edge genes are shown as heatmaps below the respective enrichment  
711 plots for G2/M checkpoint, and estrogen-response-early genes. G1, G2, and G3 are controls.  
712 K2, and K3 are karanjin treated samples. The color on the heatmap represents the expression  
713 in terms of log-normalized counts for genes (rows) across samples (columns). F. Validation.  
714 Total RNA isolated from control and karanjin treated cells were subjected to qRT-PCR  
715 analysis of the G2/M checkpoint, and estrogen-response-early genes. The  $\Delta\Delta$ Ct method was  
716 used for analysing the qPCR data. The experiment had three replicate dishes of control or  
717 karanjin treated (10  $\mu$ M) cells. The expression in one control sample was set to 1, relative to  
718 which the expression in other samples were expressed. Bars represent mean relative  
719 expression  $\pm$  sd (n = 3). For each gene the data were analysed by one-tailed t-tests. Asterisks  
720 represent significant result. (\*p < 0.05, \*\*p < 0.01, \*\*\*p < 0.001).

721 **Fig. 4.** Overlapping genomic targets of karanjin, estrogen and tamoxifen. A. Venn diagram  
722 showing the number of genes modulated by karanjin (10  $\mu$ M), estrogen (1 nM), or tamoxifen  
723 (1  $\mu$ M) in MCF-7 cells. The karanjin modulated genes were from this study. Estrogen or

724 tamoxifen modulated genes were obtained by analyzing the GSE117942 dataset as described  
725 in materials and methods. Values in the areas of intersection are the number of genes  
726 commonly regulated by two or more compounds. B. and C. Heatmaps showing the patterns  
727 of gene modulation by karanjin compared with estrogen (n = 419), or tamoxifen (n = 94),  
728 respectively. Colors represent  $\log_2$ FC expression compared to their respective controls. For  
729 better visualization of expression patterns across tamoxifen and estrogen modulated genes,  
730 *CYP11A1* has been omitted during generation of the heatmap due to its high fold change.

731 **Fig. 5.** Concentration dependent effect of karanjin on gene expression in MCF-7 and T47D  
732 cells. Cells were treated with indicated concentrations of karanjin or 10 nM E2 for 24 h.  
733 Thereafter, total RNA was isolated and subjected to qRT-PCR analysis of the indicated genes  
734 using the  $\Delta\Delta$ Ct method. The experiment was done with three replicate dishes of control or  
735 karanjin treated cells. The expression in each of the samples was expressed relative to one of  
736 the controls, which was set to 1. Bars represent mean relative expression  $\pm$  sd (n = 3). For  
737 each gene the data were analysed by one-way ANOVA followed by TukeyHSD. Significantly  
738 different means with respect to control (0  $\mu$ M karanjin) are indicated by asterisks. (\*p < 0.05,  
739 \*\*p < 0.01, \*\*\*p < 0.001)

740 **Fig. 6.** Differential involvement of ER $\alpha$  in karanjin-mediated modulation of gene expression  
741 in MCF-7 cells. A. Karanjin-mediated reduction in ER $\alpha$  protein expression in MCF-7 cells.  
742 Cells were treated with 10  $\mu$ M karanjin for the indicated periods of time. At each time point,  
743 the untreated cells (0  $\mu$ M karanjin) served as control. Total protein extracted from Laemmli  
744 buffer was subjected to western blotting analysis using the ER $\alpha$  specific antibody. Histone H3  
745 served as an internal control, which was probed with H3-specific antibody.  
746 Chemiluminescence signals were imaged in ChemiDoc XRS+ system. The images were  
747 processed in ImageJ. The background subtracted band intensity for ER $\alpha$  normalized against

748 that obtained for Histone-H3 served as a measure of ER $\alpha$  protein expression. For each time  
749 point ER $\alpha$  expression in control sample was set to 1 and that obtained for karanjin treated  
750 sample was expressed relative to control. Mean relative expression (Rel Exp) of ER $\alpha$   $\pm$  sd (n  
751 = 5) for each time-point is show below. For each time point the data were analysed by a one-  
752 tailed t-test. Significant results are indicated by asterisks. (\*p < 0.05, \*\*p < 0.01, \*\*\*p <  
753 0.001). B. ER $\alpha$  knockdown. MCF-7 cells pre-treated with scrambled (scr) or ER $\alpha$ -specific  
754 siRNA were treated with vehicle or 10  $\mu$ M karanjin (Kar) for a period of 24 h. Total protein  
755 was extracted from the phenolic fraction of RNA extraction reagent, and subjected to western  
756 blot analysis using ER $\alpha$  and  $\beta$ -actin specific antibodies.  $\beta$ -actin served as an internal control.  
757 C-J. Total RNA was extracted from MCF-7 cells, which were treated as in B. The expression  
758 of the indicated genes was analysed by qRT-PCR. The experiment was done with three  
759 replicate dishes for each experimental group. The expression in one control sample (scr + 0  
760  $\mu$ M karanjin) was set to 1, and those determined for the others were expressed relative to  
761 control. Bars represent mean relative expression  $\pm$  sd (n = 3). For each gene the data were  
762 analysed by 2 x 2 factorial ANOVA.

763



764 **Table 1.** Top 25 up-regulated genes

| <b>Gene Symbol</b> | <b>Name</b>                                             | <b>Nature</b>                                     | <b>Function<sup>@</sup></b>                                                                                         |
|--------------------|---------------------------------------------------------|---------------------------------------------------|---------------------------------------------------------------------------------------------------------------------|
| <i>CYP1A1</i>      | Cytochrome P450 Family 1 Subfamily A Member 1           | Enzyme (Aryl Hydrocarbon Hydroxylase)             | drug metabolism, steroidogenesis                                                                                    |
| <i>ANKRD29</i>     | Ankyrin Repeat Domain 29                                | Peripheral protein                                | attachment of integral membrane proteins to spectrin-actin based membrane cytoskeleton                              |
| <i>SLC7A5</i>      | Solute Carrier Family 7 Member 5                        | Transport protein (amino acid exchanger)          | sodium independent transport of neutral amino acids across membrane                                                 |
| <i>MRVII</i>       | Inositol 1,4,5-trisphosphate receptor-associated 1      | Enzyme substrate                                  | regulates IP3 induced calcium release, involved in myeloid cell growth and differentiation                          |
| <i>CYP1B1</i>      | Cytochrome P450 Family 1 Subfamily B Member 1           | Enzyme (Aryl Hydrocarbon Hydroxylase)             | drug metabolism, steroidogenesis                                                                                    |
| <i>CREG2</i>       | Cellular Repressor of E1A Stimulated Genes 2            | Enzyme (oxidoreductase)                           | repression of E1A stimulated genes involved in transcriptional regulation                                           |
| <i>ALDH1A3</i>     | Aldehyde Dehydrogenase 1 Family Member A3               | Enzyme (aldehyde dehydrogenase)                   | catalyses formation of retinoic acid, involved in embryonal development of nasal and eye region                     |
| <i>SLC7A11</i>     | Solute Carrier Family 7 Member 11                       | Transport protein (cystine/glutamate transporter) | sodium independent transport of anionic amino acids across membrane                                                 |
| <i>TENM4</i>       | Teneurin Transmembrane Protein 4                        | Transmembrane protein                             | establishes neuronal connectivity during development                                                                |
| <i>AC015712.6</i>  | Gastric Cancer Associated WDR5 And KAT2A Binding LncRNA | Long non-coding RNA                               | gene silencing of transcriptional regulators such as KAT2A, WDR5                                                    |
| <i>AC015712.2</i>  | ALDH1A3 Antisense RNA 1                                 | Single stranded anti-sense RNA                    | silencing of ALDH1A3 at transcriptional level                                                                       |
| <i>ALDH3A1</i>     | Aldehyde Dehydrogenase 3 Family Member A1               | Enzyme (aldehyde dehydrogenase)                   | detoxification of alcohol-derived acetaldehyde, confers resistance to UV radiation in cells                         |
| <i>TIPARP</i>      | TCDD Inducible Poly (ADP-Ribose) Polymerase             | Enzyme (ribosyl transferase)                      | catalyses mono-ADP-ribosylation of basic amino acids, inhibits transcription activator activity of AHR              |
| <i>CENPE</i>       | Centromere Protein E                                    | Kinesin-like motor protein                        | mediates stable spindle microtubule capture at kinetochores, required for chromosomal alignment during prometaphase |
| <i>LAMA3</i>       | Laminin Subunit Alpha 3                                 | ECM remodelling protein                           | mediates formation and function of basement membrane, cell migration, mechanical signal transduction                |

|                  |                                                       |                                      |                                                                                                            |
|------------------|-------------------------------------------------------|--------------------------------------|------------------------------------------------------------------------------------------------------------|
| <i>CENPF</i>     | Centromere Protein F                                  | nuclear-matrix protein               | associates with centromere-kinetochore complex, regulates chromosomal segregation during mitosis.          |
| <i>VTCN1</i>     | V-Set Domain Containing T Cell Activation Inhibitor 1 | Cell surface receptor                | suppresses tumor-associated antigen-specific T cell immunity, promotes cell cytotoxicity                   |
| <i>WSCD1</i>     | WSC Domain Containing 1                               | Enzyme (sulphotransferase)           | involved in tissue development and distribution at different organ sites                                   |
| <i>MYO16</i>     | Myosin XVI                                            | Actin-based motor protein            | intracellular movement of membranous compartments, regulates cell cycle progression                        |
| <i>LINC00930</i> | Long Intergenic Non-Protein Coding RNA 930            | Long non-coding RNA                  | implicated role in the development of Acute Megakaryocytic Leukaemia (AMKL)                                |
| <i>RND1</i>      | Rho family GTPase 1                                   | Enzyme (Rho GTPase)                  | regulates the organization of the actin cytoskeleton in response to extracellular growth factors.          |
| <i>ASPM</i>      | Assembly Factor for Spindle Microtubules              | Calmodulin-binding messenger protein | involved in normal mitotic spindle function and co-ordination of mitotic processes, regulates neurogenesis |
| <i>AREG</i>      | Amphiregulin 2                                        | Growth factor                        | part of EGFR and TGF $\beta$ signalling pathways, involved in mammary, oocyte and bone tissue development  |
| <i>SCARA5</i>    | Scavenger Receptor Class A Member 5                   | Ferretin receptor                    | mediates non-transferrin dependent delivery of iron to cells by ferretin endocytosis                       |
| <i>RGS22</i>     | Regulator of G Protein Signaling 22                   | GTPase activating protein            | inhibits signal transduction by increasing GTPase activity                                                 |

765 <sup>@</sup> Curated from GeneCards, KEGG, and Uniprot.

766

767 **Table 2:** Top 25 down-regulated genes.

| <b>Gene Symbol</b> | <b>Name</b>                                                          | <b>Nature</b>                                 | <b>Function<sup>@</sup></b>                                                                                         |
|--------------------|----------------------------------------------------------------------|-----------------------------------------------|---------------------------------------------------------------------------------------------------------------------|
| <i>BRINP2</i>      | Bone Morphogenetic Protein/Retinoic Acid Inducible Neural-Specific 2 | Regulatory protein                            | cell cycle, positive regulation of neuron differentiation, negative regulation of mitotic cell cycle                |
| <i>B3GALT5-AS1</i> | B3GALT5 Antisense RNA 1                                              | Long non-coding RNA                           | implicated role in development of Rectum Adenocarcinoma                                                             |
| <i>B3GALT5</i>     | Beta-1,3-galactosyltransferase 5                                     | Enzyme (Transferase)                          | glycosphingolipid biosynthesis; protein glycosylation; acetylgalactosaminyltransferase activity                     |
| <i>CHST1</i>       | Keratan sulphate 6-sulfotransferase 1                                | Enzyme (Sulfotransferase)                     | glycan biosynthesis; sulfotransferase activity and keratan sulfotransferase activity                                |
| <i>CSTA</i>        | Cystatin A                                                           | Cysteine Protease Inhibitor                   | epidermal development and maintenance; cell-cell adhesion; keratinocyte differentiation                             |
| <i>ADAM2</i>       | ADAM Metallopeptidase Domain 2                                       | Enzyme (Peptidase)/membrane-anchored proteins | cell-cell and cell-matrix interactions, including fertilization, muscle development, and neurogenesis.              |
| <i>SLIT1</i>       | Slit Guidance Ligand 1                                               | Glycosaminoglycan binding protein             | calcium ion binding; axon guidance; negative chemotaxis                                                             |
| <i>GHR</i>         | Growth hormone receptor                                              | Cytokine receptor                             | PI3K-AKT, JAK-STAT signaling pathway, growth hormone synthesis, secretion and action                                |
| <i>CXCR4</i>       | C-X-C chemokine receptor type 4                                      | Chemokine receptor                            | regulates calcium, chemokine signaling pathway                                                                      |
| <i>RET</i>         | Proto-oncogene tyrosine-protein kinase Ret                           | Enzyme (Tyrosine protein kinase)              | regulates ERK signaling, PI3K signaling, calcium signaling pathway, involved in central carbon metabolism in cancer |
| <i>RASSF4</i>      | Ras association domain family member 4                               | KRAS effector protein                         | Regulates hippo signaling pathway, involved in tumor suppression                                                    |
| <i>SIM1</i>        | SIM BHLH transcription factor 1                                      | Transcription factor                          | Genetic information processing; DNA-binding transcription factor activity and obsolete signal transducer activity   |
| <i>NR4A3</i>       | Nuclear receptor subfamily 4 group A member 3                        | Nuclear receptor                              | Genetic information processing; signaling and cellular processes; transcriptional mis-regulation in cancer          |

|                 |                                                              |                                                              |                                                                                                                                                             |
|-----------------|--------------------------------------------------------------|--------------------------------------------------------------|-------------------------------------------------------------------------------------------------------------------------------------------------------------|
| <i>NELL2</i>    | Neural EGFL like 2                                           | Laminin domain-containing proteins                           | Signaling and cellular processes; plays a role in neural cell growth and differentiation as well as in oncogenesis                                          |
| <i>DIO1</i>     | Iodothyronine deiodinase 1                                   | Enzyme (Oxidoreductase)                                      | Thyroid hormone metabolism and signaling pathway; cellular amino acid metabolic process                                                                     |
| <i>CLEC3A</i>   | C-type lectin domain family 3 member A                       | Carbohydrate-binding protein                                 | promotes cell adhesion to laminin-332 and fibronectin                                                                                                       |
| <i>FUT2</i>     | Fucosyltransferase 2                                         | Enzyme (Transferases)                                        | membrane trafficking and genetic information processing                                                                                                     |
| <i>HOXB2</i>    | Homeobox B2                                                  | Transcription factor                                         | involved in development and part of developmental regulatory system that provides cells with specific positional identities on the anterior-posterior axis. |
| <i>C10orf10</i> | DEPP1 autophagy regulator                                    | Transcription factor activator                               | critical modulator of FOXO3-induced autophagy via increased cellular ROS.                                                                                   |
| <i>PLA2G10</i>  | Secretory phospholipase A2                                   | Hydrolases (phospholipase A2)                                | phospholipid remodelling; maturation and activation of innate immune cells                                                                                  |
| <i>KCNJ8</i>    | Potassium inwardly rectifying channel subfamily J member 8   | Integral membrane protein                                    | role in cGMP-PKG signaling pathway, potassium transport inside the cell                                                                                     |
| <i>ADGRA2</i>   | Adhesion G protein-coupled receptor A2                       | Enzyme (Peptidase) and inhibitor; G protein-coupled receptor | metabolism; signaling and cellular processes                                                                                                                |
| <i>IL1R1</i>    | Interleukin 1 receptor type 1                                | Cytokine receptor                                            | signal transduction; NF-kappa B signaling pathway; Cytokine-cytokine receptor interaction                                                                   |
| <i>SLC35C1</i>  | Solute carrier family 35 (GDP-fucose transporter), member C1 | Transporters (Solute carrier family)                         | signaling and cellular processes; N-Glycan biosynthesis                                                                                                     |
| <i>RGS11</i>    | Regulator of G Protein Signaling 11                          | GTPase-activating protein                                    | involved in cAMP Pathway and G <sub>αi</sub> signaling                                                                                                      |

768   <sup>@</sup> Curated from GeneCards, KEGG, and Uniprot.

769

770

771

772

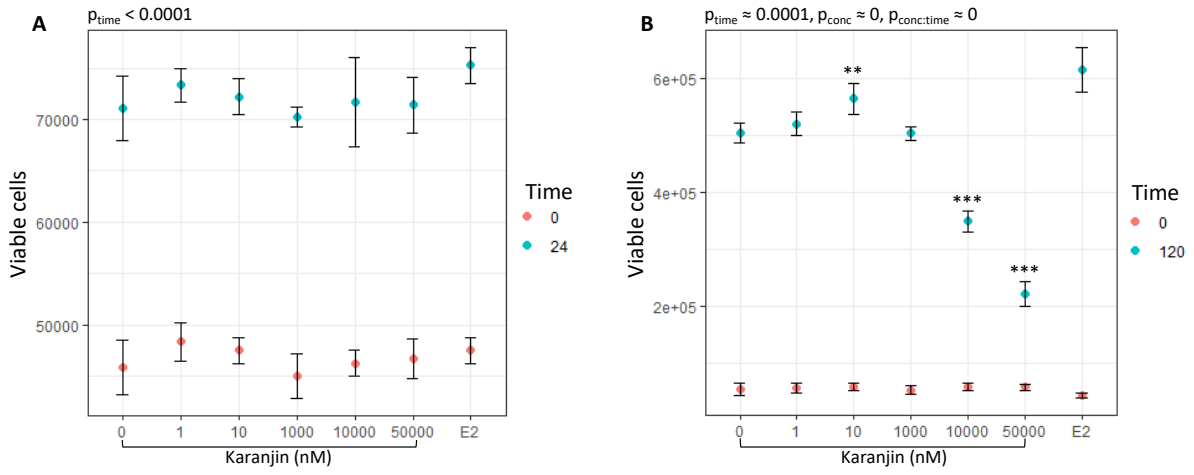

773

774

775

776

**Figure 1**

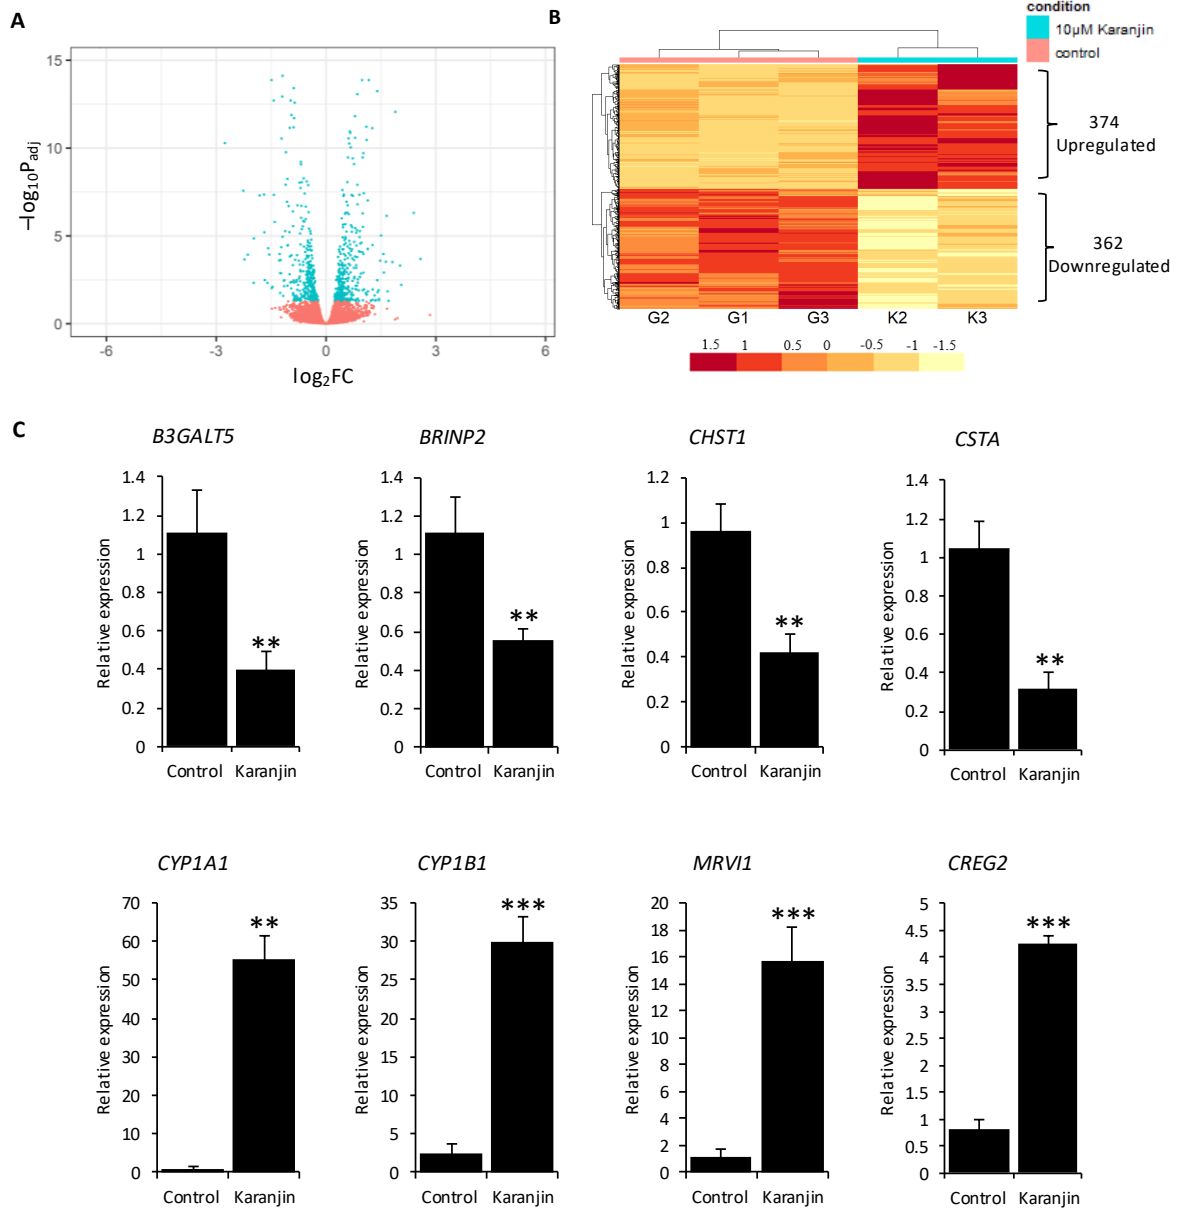

777

778

**Figure 2**

779

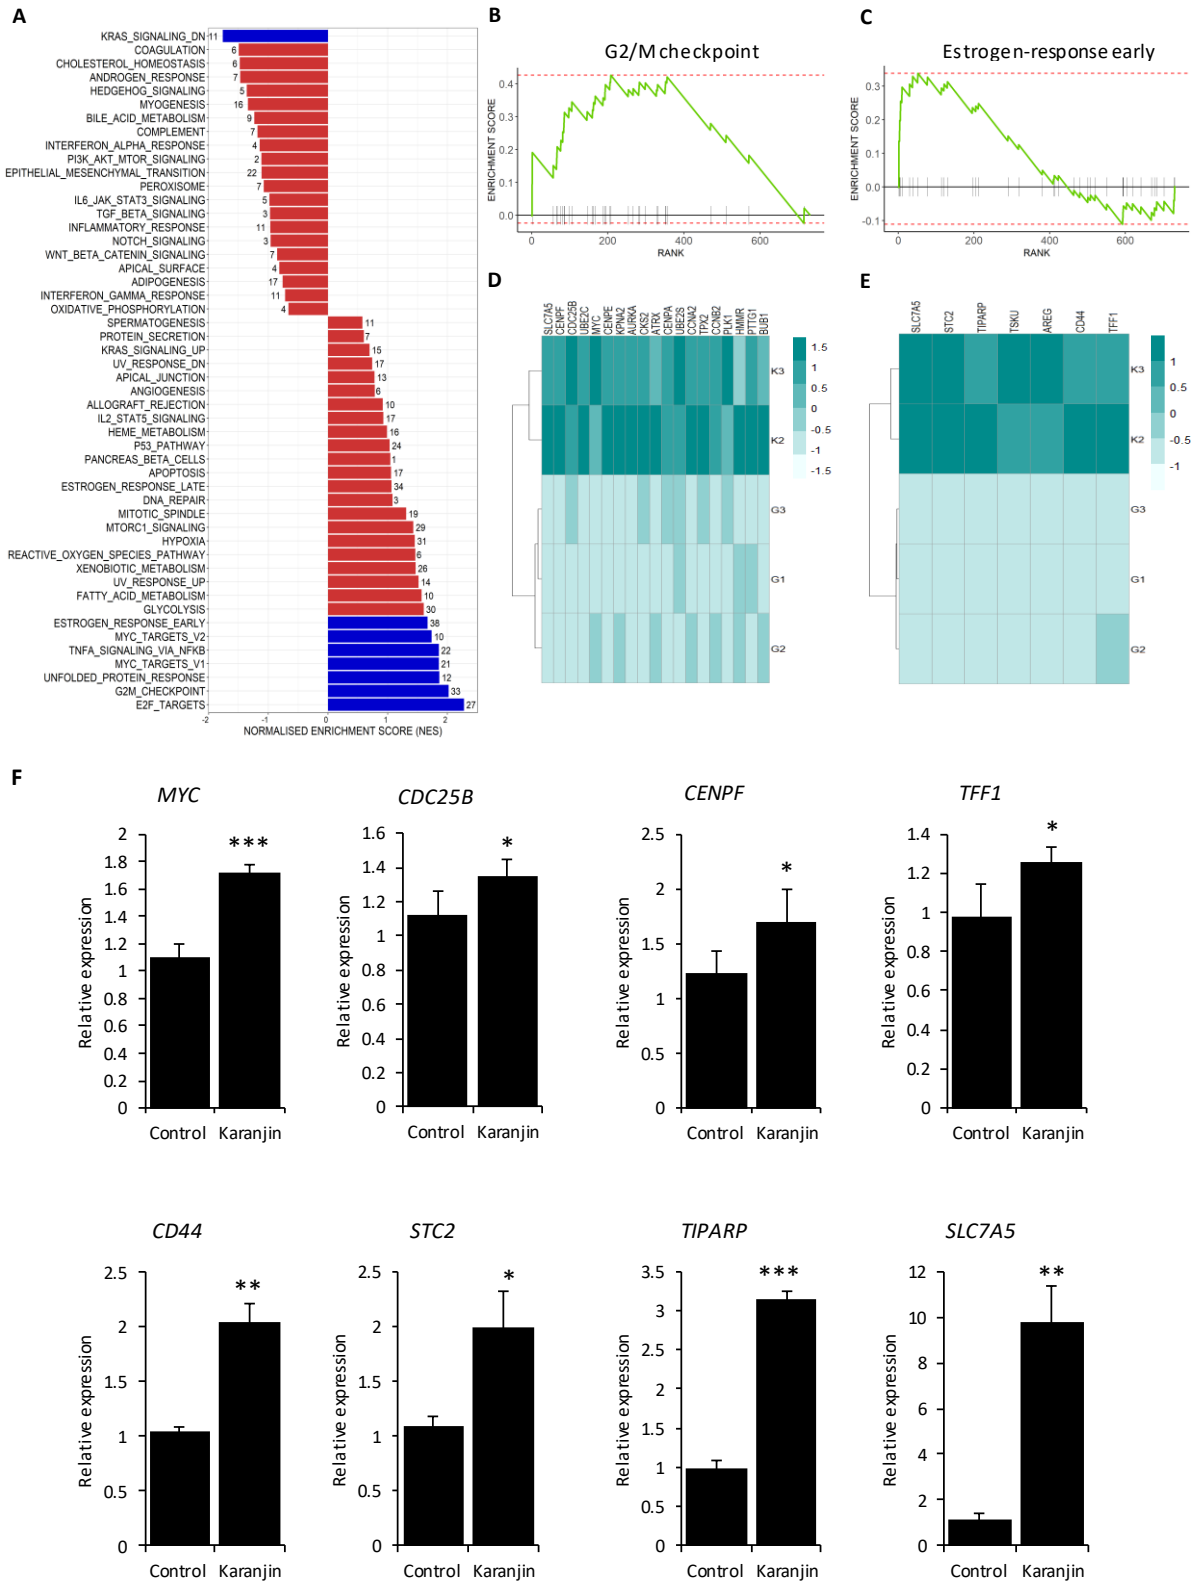

780

781

782

783

Figure 3

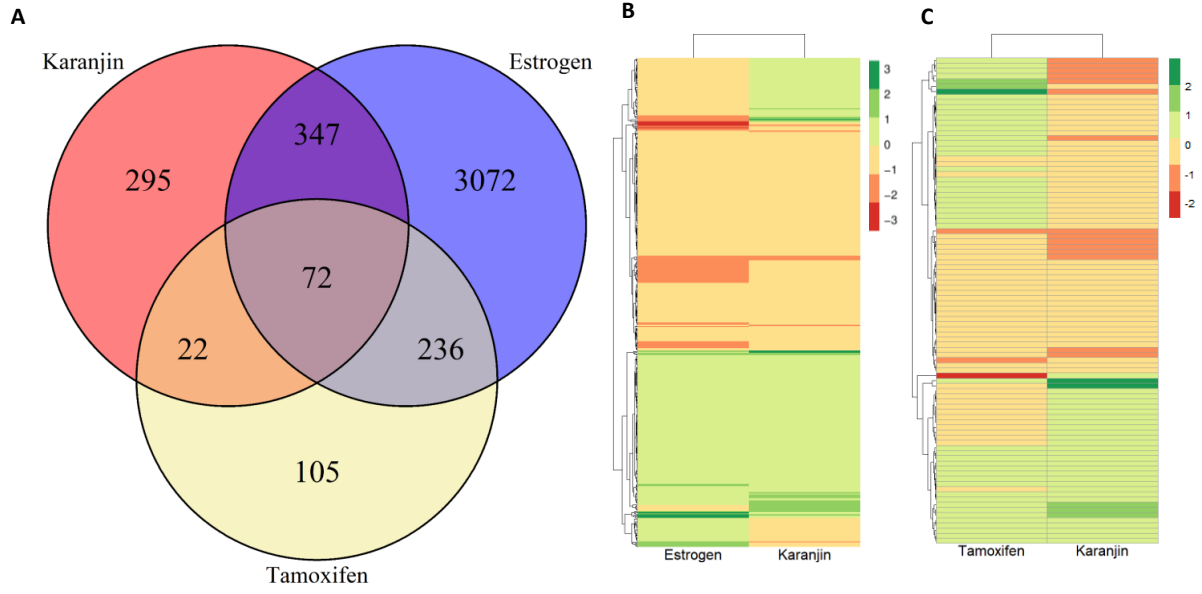

784

785

786

787

**Figure 4**



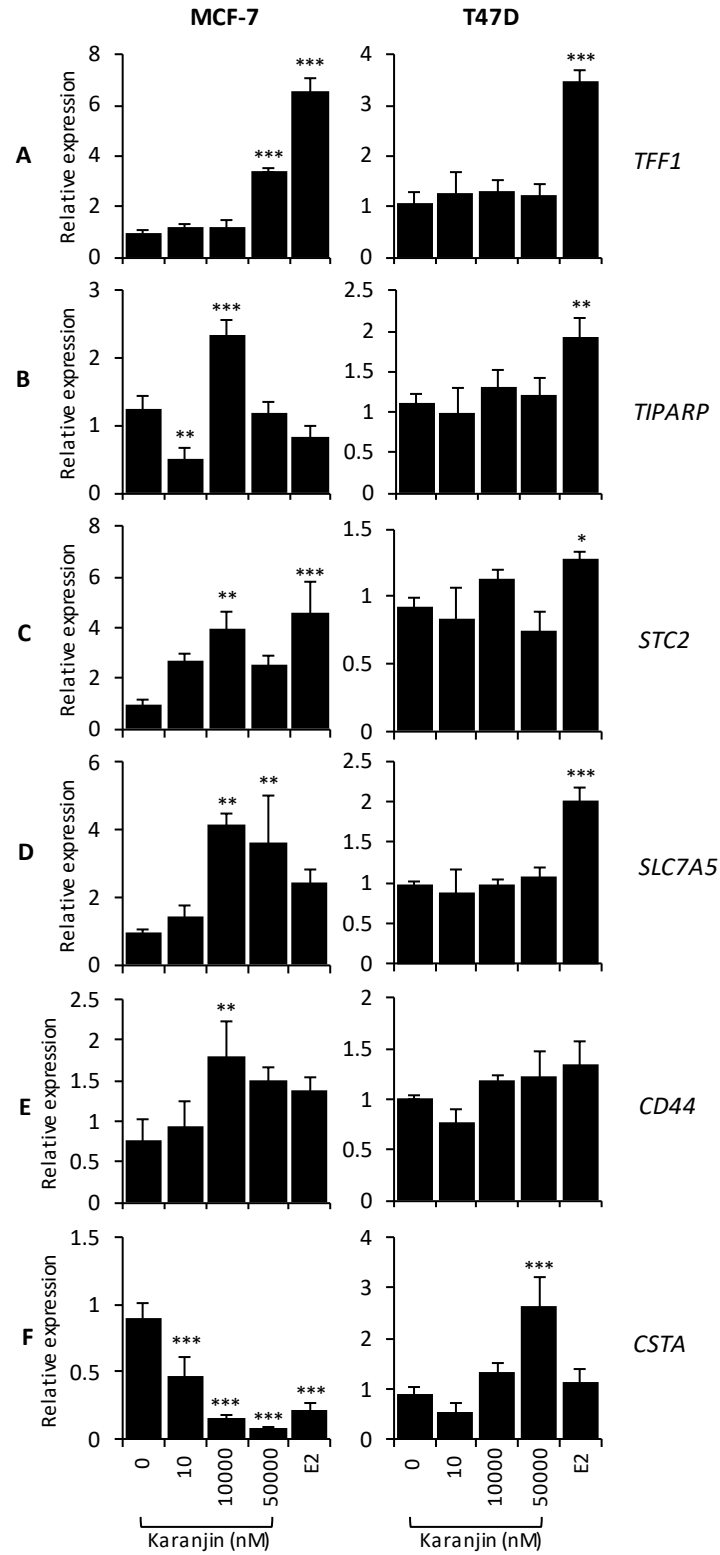

788

789

790

791

Figure 5

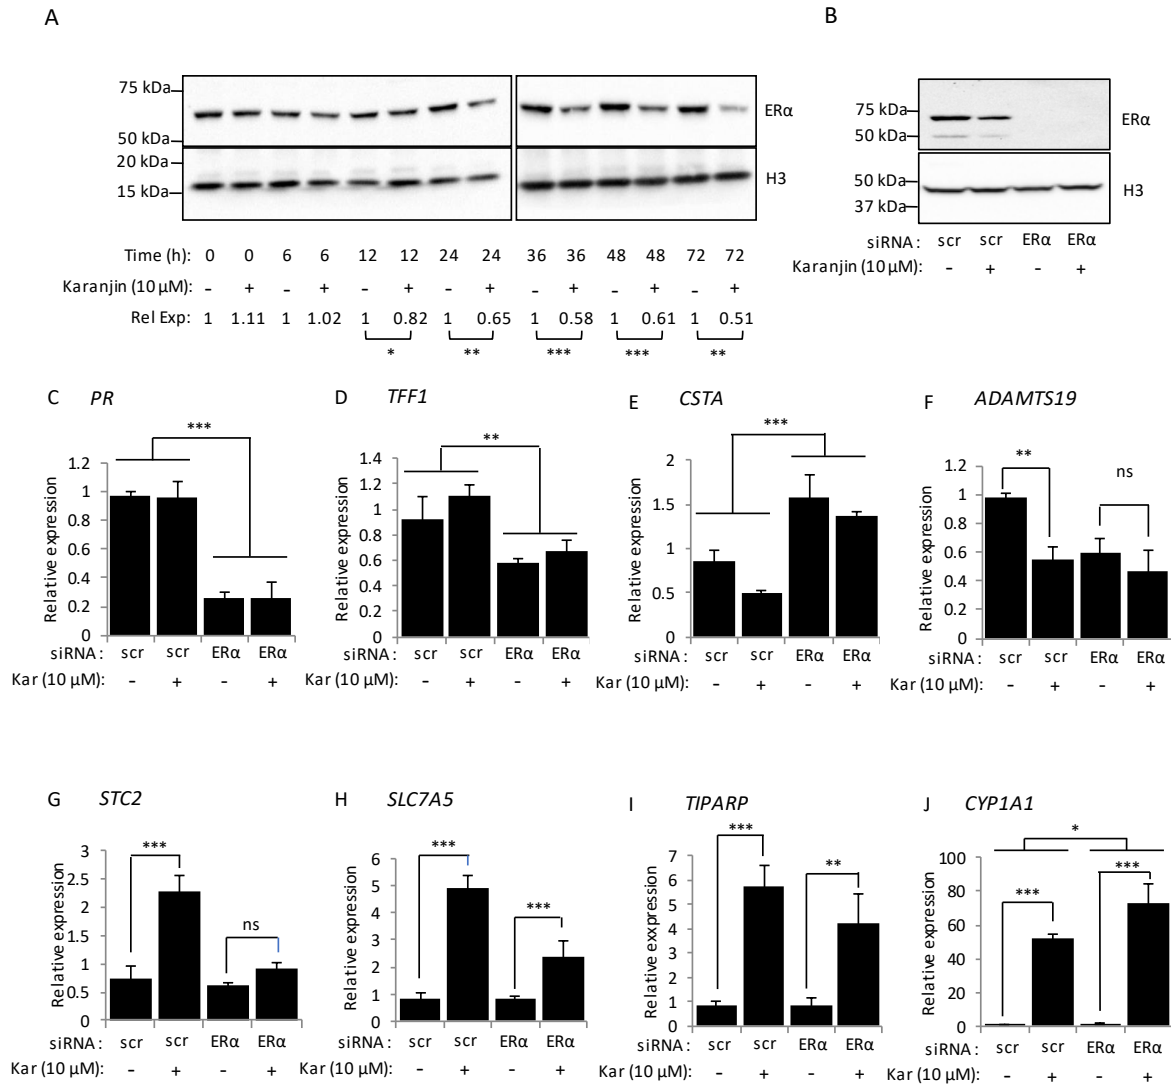

792

793

**Figure 6**
